# Supplementary material for: Conserved phosphorylation sites in the activation loop of the Arabidopsis phytosulfokine receptor PSKR1 differentially affect kinase and receptor activity
Source: Oxford University Press journal article supplement (doi:10.1042/bj20150147), 2015-10-16
Supplement: bj4720379add.pdf [file bj4720379add.pdf]

## Supplemental Figure S1A, B

**A**

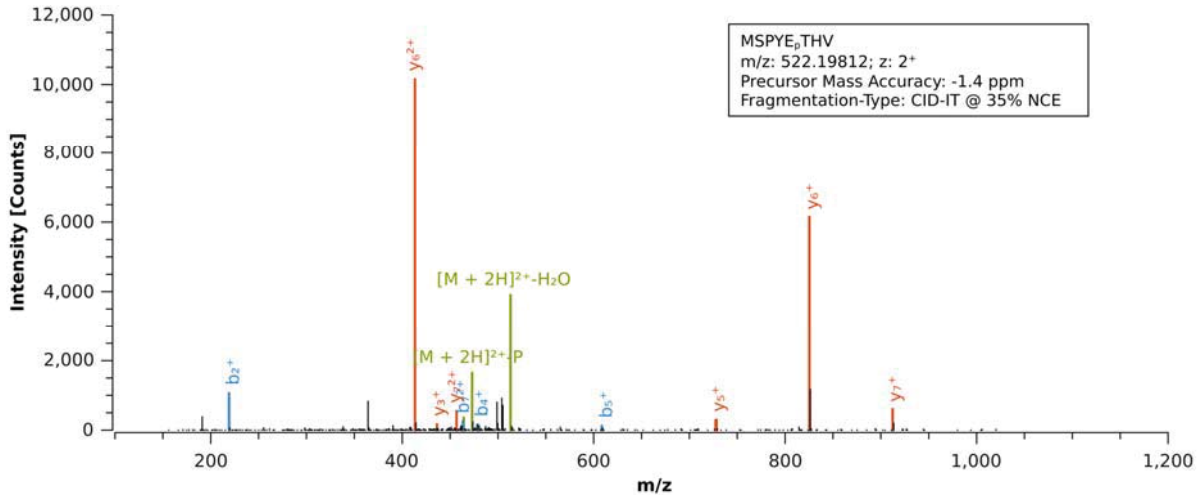

**B**

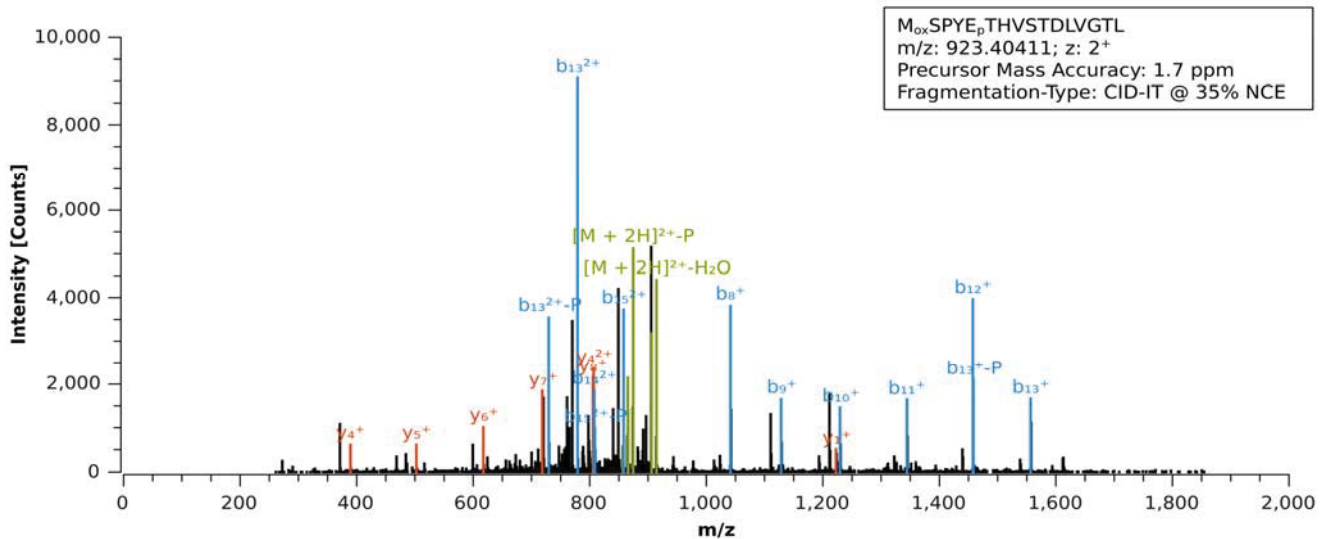

**Supplemental Figure S1.** LC-ESI MS/MS spectra identifying PSKR1 *in vitro* phosphorylation sites.

**(A)** LC-ESI MS/MS of the phosphopeptide MSPYEpTHV with a measured m/z value of 522.20; a precursor charge state of 2+. Calculated mass deviation was -1.4 ppm. The precursor ion was fragmented by Collision Induced Dissociation (CID) and analysed in the ion trap mass analyser (IT). The normalized collision energy was set to 35%. Peptide ions, which were passing the filter settings were annotated in red (y-ions) and blue (b-ions). Precursor related ions were labeled in green.

**(B)** LC-ESI MS/MS of the phosphopeptide MoxSPYEpTHVSTDVLVGT with a measured m/z value of 923.40; a precursor charge state of 2+. The mass deviation was calculated to be 1.7 ppm. Precursor ion fragmentation and analysis were carried out as described for (A).

# Supplemental Figure S1C, D

C

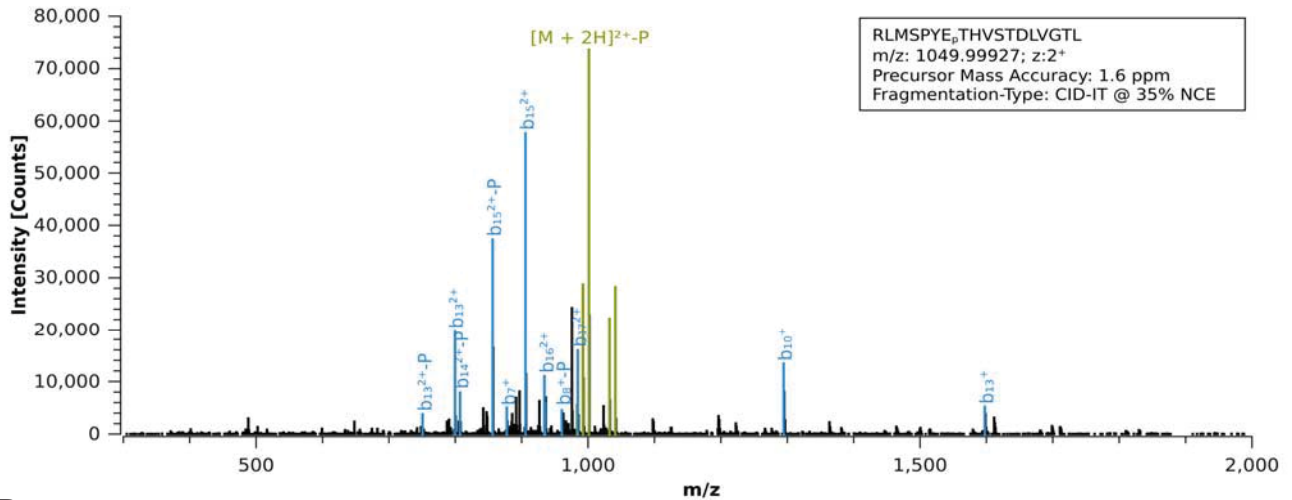

D

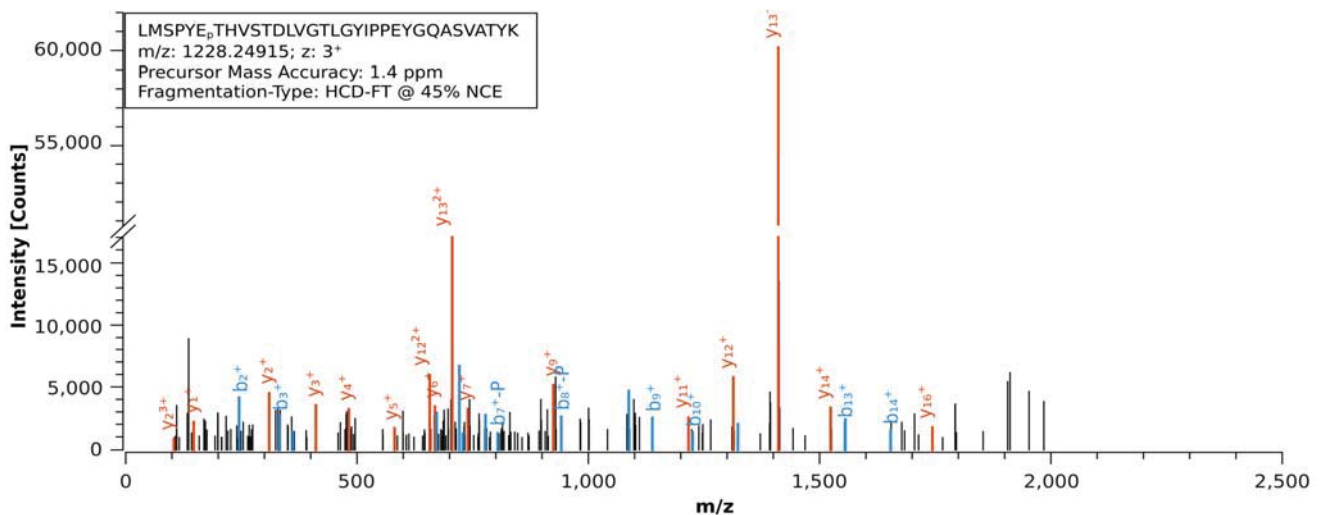

**Supplemental Figure S1.** LC-ESI MS/MS spectra identifying PSKR1 *in vitro* phosphorylation sites.

(C) LC-ESI MS/MS of the phosphopeptide RLMSPYE<sub>p</sub>THVSTDLVGTL with a measured m/z value of 1050.00; a precursor charge state of 2+. The mass deviation was calculated to be 1.6 ppm. Precursor ion fragmentation and analysis were carried out as described for (A).

(D) LC-ESI MS/MS of the phosphopeptide LMSPYE<sub>p</sub>THVSTDLVGLGYPPEY<sub>G</sub>QASVATYK with a measured m/z value of 1228.24; a precursor charge state of 3+. The mass deviation was calculated to be 1.4 ppm. The precursor ion was fragmented by Higher Energy Collision Dissociation (HCD) and analysed in the Orbitrap mass analyser (FT). The normalized collision energy was set to 45%.

## Supplemental Figure S2A, B

**A**

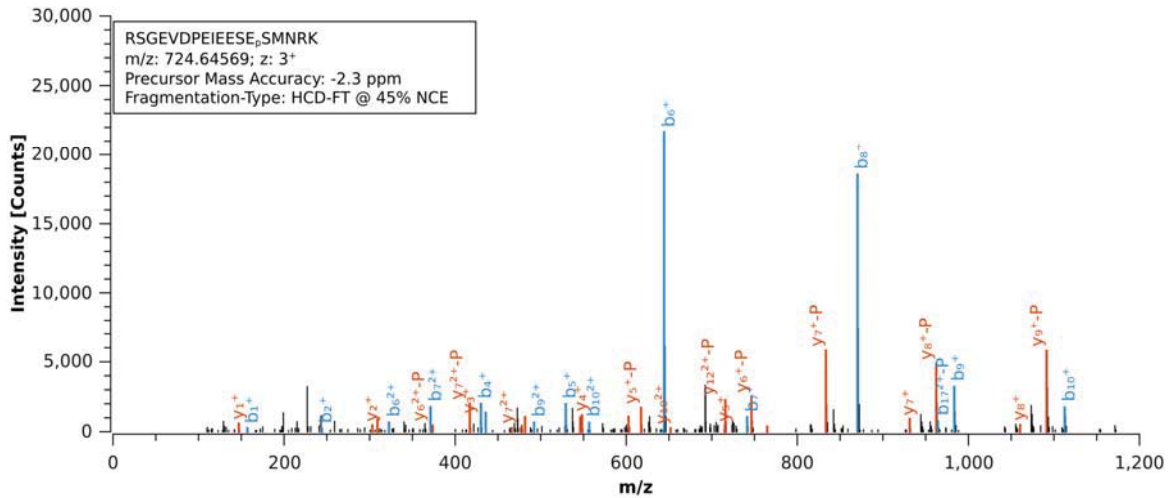

**B**

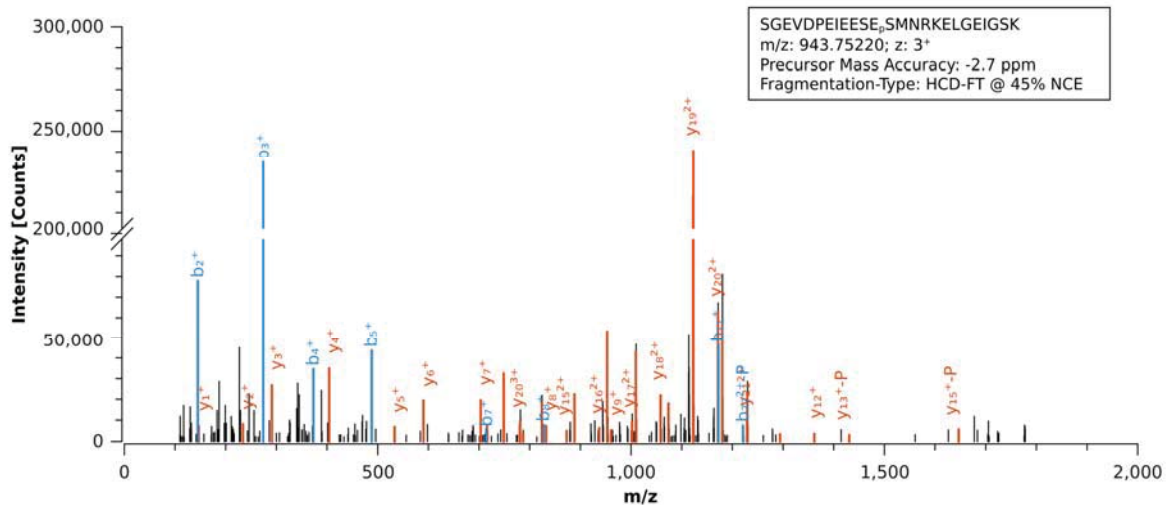

**Supplemental Figure S2.** LC-ESI MS/MS spectra identifying PSKR1 *in planta* phosphorylation sites.

**(A)** LC-ESI MS/MS measurement in Orbitrap of the phosphopeptide RSGEVDPEIEESEpSMNRK with a measured m/z value of 724.64, a precursor charge state of 3<sup>+</sup>. The mass deviation was calculated to be -2.3 ppm. The precursor ion was fragmented by Higher Energy Collision activated dissociation (HCD) and analyzed in the Orbitrap mass analyzer (FT). The normalized collision energy was set to 45%. Peptide ions, which were passing the filter settings were annotated in red (y-ions) and blue (b-ions).

**(B)** LC-ESI MS/MS measurement in Orbitrap of the phosphopeptide SGEVDPEIEESEpSMNRKELGEIGSK with a measured m/z value of 943.75, a precursor charge state of 3<sup>+</sup>. The mass deviation was calculated to be -2.7 ppm. Precursor ion fragmentation and analysis were carried out as described for (A).

## Supplemental Figure S2C

C

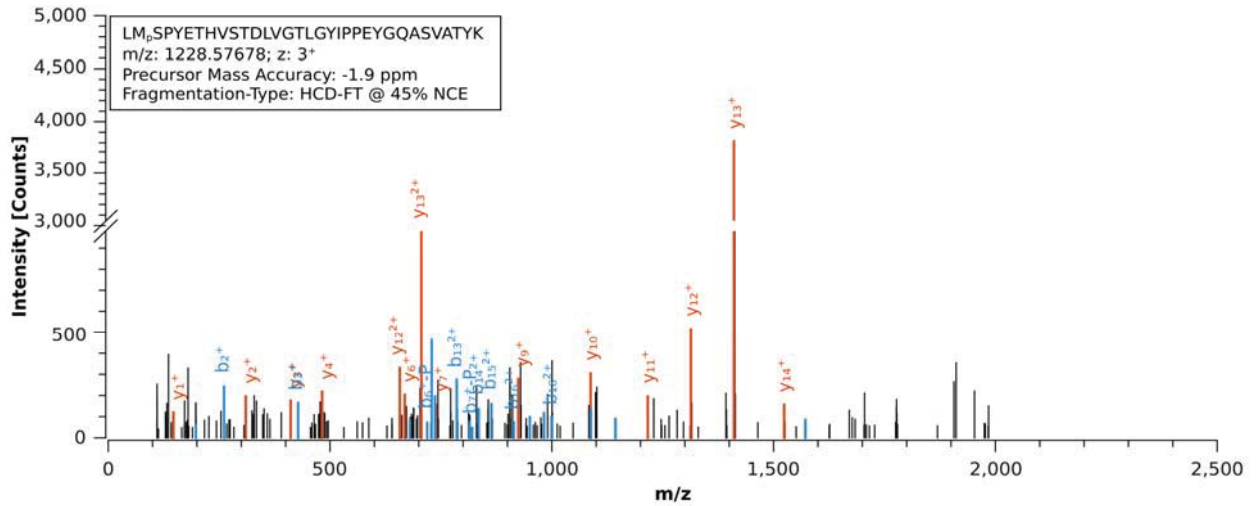

**Supplemental Figure S2.** LC-ESI MS/MS spectra identifying PSKR1 *in planta* phosphorylation sites.

**(C)** LC-ESI MS/MS measurement in Orbitrap of the phosphopeptide LM<sub>p</sub>SPYETHVSTDLVGLGYIPPEYGQASVATYK with a measured m/z value of 1228.57, a precursor charge state of 3<sup>+</sup>. The mass deviation was calculated to be -1.9 ppm. Precursor ion fragmentation and analysis were carried out as described for (A).

## Supplemental Figure S3

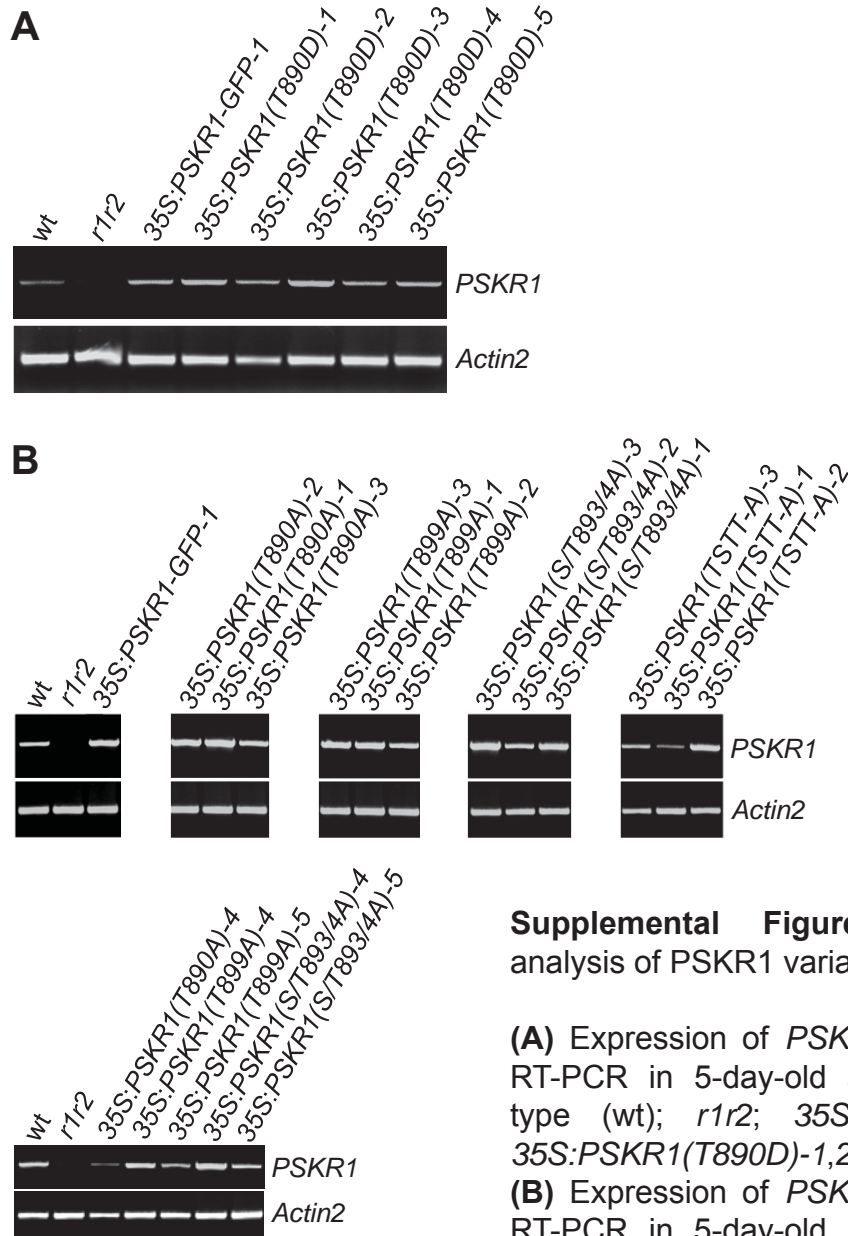

**Supplemental Figure S3.** Expression analysis of *PSKR1* variants.

**(A)** Expression of *PSKR1* was analyzed by RT-PCR in 5-day-old seedlings from wild-type (wt); *r1r2*; *35S:PSKR1-GFP-1* and *35S:PSKR1(T890D)-1,2,3,4,5* lines.

**(B)** Expression of *PSKR1* was analyzed by RT-PCR in 5-day-old seedlings from wild-type (wt), *r1r2*, *35S:PSKR1-GFP-1*; *35S:PSKR1(T890A)-1,2,3,4*; *35S:PSKR1(T899A)-1,2,3,4,5*; *35S:PSKR1(S/T893/4A)-1,2,3,4,5* and *35S:PSKR1(TSTT-A)-1,2,3* each in the *r1r2* background. *Actin2* cDNA was amplified as a control for RNA input.

# Supplemental Figure S4

| Species                           | Accession | Sequence                                                      | Accession |
|-----------------------------------|-----------|---------------------------------------------------------------|-----------|
| <i>Arabidopsis thaliana</i>       | 681       | RARRRSGEVDPEIEESESMMNR-KELGEIGSKLVVLFQSNND-----KELSYDLLLL     | 729       |
| <i>Physcomitrella patens</i>      | 1008      | RWRLLKQEAIAKTKDLERMKLTVMMEAGACMVIPKSKEPLSINVAMFEQPLLRLTLADILL | 1068      |
| <i>Selaginella moellendorffii</i> | 719       | MLSFSSRAGHRQDIAGRNPKEMSVAQMMDLTVMFGQRYR-----RITVGDLIK         | 768       |
| <i>Amborella trichopoda</i>       | 710       | RRHRKRKCGDGVCRTAGGIR--RSSEFSGSRMVLFPQDQK-----KELTICDLLK       | 758       |
| <i>Brachypodium distachyon</i>    | 718       | MKRSFRRQDHTVKAVADTDG--ALELAPASLVLLFQNKDDDD-----KAYTISDILK     | 766       |
| <i>Oryza sativa</i>               | 717       | LKSSFRQDYIVKAVADITE---ALELAPASLVLLFQNKDDG-----KAMTIGDILK      | 765       |
| <i>Panicum virgatum</i>           | 706       | RIVHSRMQEPNPKAVANAE---DSESSNSCLVLLFQNN-----KEISIEDILK         | 750       |
| <i>Setaria italica</i>            | 717       | LKSRFRQDHTVKAVADTDNR--ALELAPASLVLLFQNKDD-----KALTIADILK       | 764       |
| <i>Sorghum bicolor</i>            | 715       | LKSSFNKQDHTVKAVKDTNQ---ALELAPASLVLLFQDKAD-----KALTIADILK      | 762       |
| <i>Zea mays</i>                   | 717       | LKSNFRQDHTVKAVADTDR---ALELAPASLVLLFQNKAD-----KALTIADILK       | 764       |
| <i>Aquilegia coerulea</i>         | 684       | TRTDSHKQDHTKVDNFDSSD--NVLYPSGSRVLLFEDEDN-----NNELFIEDLLK      | 733       |
| <i>Mimulus guttatus</i>           | 685       | VCSCRRRGVDPEMEYERTSSKTDYFETS SVVILCQNKDKD--INISSTSKKEIFLDDLLK | 744       |
| <i>Solanum lycopersicum</i>       | 631       | VRASSRKVVDQEKELDASNRE---LEDLGSLLVIFPHNKE-----NTKEMCLDILLK     | 679       |
| <i>Solanum tuberosum</i>          | 677       | IRASSRKVVDQEKELDASNRE---LEDLGSLLVIFPHNKE-----NTKEMCLDILLK     | 725       |
| <i>Vitis vinifera</i>             | 465       | IPVVGDFIVDLDEEIEE-RPHR-LS-EVLGSSKLVLFQNSGC-----KDLSDVADLLK    | 512       |
| <i>Eucalyptus grandis</i>         | 679       | MRAHRRGEVDPEKEVVGRKE--RDI EDLESRLVLMVFQNKDR-----CEKLSYEDISR   | 728       |
| <i>Populus trichocarpa</i>        | 693       | LRAHNRGEVDPEKEVDADTND--KDLEELGSKLVVLLQNKES-----YKDLSDLEDLLK   | 742       |
| <i>Linum usitatissimum</i>        | 719       | RRARGDLINSLDEEAEE-ESQR-SS-QALMTSKLVLFQNSDC-----KGLTVDLILLK    | 766       |
| <i>Manihot esculenta</i>          | 693       | RAHSRGEVDAEKEGVEANTND--KDLEELGSKLVVLFQNKEN-----YRELSLEELLK    | 742       |
| <i>Ricinus communis</i>           | 678       | LRAHSRGEVDPEKEEPTDND--KDLEELGSKLVVLFQNKEN-----YKELSDLEDLLK    | 727       |
| <i>Carica papaya</i>              | 582       | LRAHSRGEVDPER-DFDGN--KDLEELGSKLVVLFQNKED-----NKDLSFDLILLK     | 630       |
| <i>Gossypium raimondii</i>        | 678       | LRTHKRNEVDPEKEEPTDND--KNLEELSSRLVVLFQNWES-----YKELCIDDLLE     | 727       |
| <i>Theobroma cacao</i>            | 680       | LRAHNRGEVDPEKEEPTDND--KDLEELSSRLVVLFQNRRT-----YKELCIDDLLE     | 729       |
| <i>Arabidopsis lyrata</i>         | 681       | RARRRSGEVDPEIEESESMMNR-KELGEIGSKLVVLFQSNND-----KELSYDLLLL     | 729       |
| <i>Arabidopsis thaliana</i>       | 681       | RARRRSGEVDPEIEESESMMNR-KELGEIGSKLVVLFQSNND-----KELSYDLLLL     | 729       |
| <i>Boechera stricta</i>           | 691       | RARRRSGEVDPEIEESESMMNR-KELGEIGSKLVVLFQSNND-----KELSYDLLLL     | 739       |
| <i>Brassica rapa</i>              | 689       | HARRRSGEVDPEIEESESMMNR-KDLEEGSKLVVLFQSDS-----KDLSDFDLILLK     | 736       |
| <i>Capsella grandiflora</i>       | 675       | RARRRSGEVDPEIEESESMMNR-KELGEIGSKLVVLFQSNND-----KELSYDLLLL     | 723       |
| <i>Capsella rubella</i>           | 689       | RARRRSGEVDPEIEESESMMNR-KELGEIGSKLVVLFQSNND-----KELSYDLLLL     | 737       |
| <i>Eutrema salsugineum</i>        | 690       | RARRRSGEVDPEIEESESMMNR-KEVEEIGSKLVVLFQSNND-----KDLSDFDLILLK   | 737       |
| <i>Citrus sinensis</i>            | 692       | LRAHSRGEVDPEKEEANTND--KDLEELGSKLVVLFPHNKE-----KEISIDDLLE      | 739       |
| <i>Citrus clementina</i>          | 692       | LRAHSRGEVDPEKEEANTND--KDLEELGSKLVVLFPHNKE-----KEISIDDLLE      | 739       |
| <i>Cucumis sativus</i>            | 366       | LRPPRGRVGDPEVEEENIDN--KDLEEVKTGLVLFQNNND-----GSLSDLEDLLK      | 414       |
| <i>Glycine max</i>                | 724       | KRDDDKPMDNFDDELNGRPRR-LS-EALASKLVLFQNSDC-----KDLTVADLILLK     | 772       |
| <i>Malus domestica</i>            | 688       | VRAHSRREVDPEREDHDTNG--KDLEELGSKLVVLFQNKDA-----NKELSDLDDLQ     | 737       |
| <i>Medicago truncatula</i>        | 720       | KREEDKPIDSDPEEMGRPR-LSSEGFVASKLVLFQNSDC-----KDLTVSDLILLK      | 769       |
| <i>Phaseolus vulgaris</i>         | 720       | RRDDDKPIDNDEELNGRPHR-LS-EALVSSKLVLFQNSDC-----KDLTVADLILLK     | 711       |
| <i>Prunus persica</i>             | 689       | LRAHSRREVDPEKEEYDSDNG--KDLEELGSKQVLFQNKDT-----DKELSDLDDLQ     | 738       |

## ATP binding region

| Species                  | Accession | Sequence                                                                                            | Accession |
|--------------------------|-----------|-----------------------------------------------------------------------------------------------------|-----------|
| <i>A. thaliana</i>       | 730       | STNSFDQANI ICGGFGMVKYKALLPDGKVAIKKLSGD--CGIEREFQAEVETLSRAQHPNLVLLRGFCFYKN-DRLLIYSYMENGLDYLWHERND    | 824       |
| <i>P. patens</i>         | 1069      | ATNNFCKTNI IGDGGFGTVYKAVLPDTRKVAIAKLLGAS--RSQGNREFLAEMETLGKVKHRLVPLLGYSFGE-EKLLVYEMVNGSLDYLWLRNRAD  | 1164      |
| <i>S. moellendorffii</i> | 769       | ATNNFDATNI ICGGFGLVKFNALPDGRKVAIAKRLTSEDGGPQMEKEFDALSTLGNITHPNLVSLRGYCRGLMRDRLLVYSYMENGLDYLWHERSD   | 866       |
| <i>A. trichopoda</i>     | 759       | ATDNFDQANI ICGGFGLVYKALLPDGRKVAIAKRLSGD--CGQMDREFQAEVESLSRAQHKNLVLLQGYCRHGD-DRLLIYSYMENGLDYLWHERLD  | 853       |
| <i>B. distachyon</i>     | 767       | STNNFDQANI ICGGFGLVYKALLPDGATIAIKRLSGG--FGQMEREFKAEVETLSKAKHRLVLLQGYCRVGS-DRLLIYSYMENGLDYLWHEKPD    | 861       |
| <i>O. sativa</i>         | 766       | STNNFDQANI ICGGFGLVYKALLPDGATIAIKRLSGD--FGQMEREFKAEVETLSKQHPNLVLLQGYCYRIGN-DRLLIYSYMENGLDHLWHEKPD   | 860       |
| <i>P. virgatum</i>       | 751       | STNNFDQAY IVCGGFGLVYKSLPDGRVAIAKRLSGD--YSQIEREFQAEVETLSRAQHDNLVLLQGYCKVGN-DRLLIYSYMENGLDYLWHERAD    | 845       |
| <i>S. italica</i>        | 765       | STNNFDQANI ICGGFGLVYKALLPDGATIAIKRLSGD--FGQMEREFKAEVETLSKQHPNLVLLQGYCYRIGS-DRLLIYSYMENGLDHLWHEPN    | 859       |
| <i>S. bicolor</i>        | 763       | STNNFDQANI ICGGFGLVYKALPDGAAIAIKRLSGD--FGQMEREFKAEVETLSKQHPNLVLLQGYCYRIGS-DRLLIYSYMENGLDHLWHEKPD    | 857       |
| <i>Z. mays</i>           | 765       | STNNFDQANI ICGGFGIVYKALPDGAAIAIKRLSGD--FGQMEREFKAEVETLSKQHPNLVLLQGYCYRIGS-DRLLIYSYMENGLDHLWHEKPD    | 859       |
| <i>A. coerulea</i>       | 734       | STNNFDQANI ICGGFGLVYKALLPDGRKVAIAKRLSGD--CGQMEREFQAEVETLSRAQHNLVLLQGYCCKN-DRLLIYSYMENGLDYLWHEKLD    | 828       |
| <i>M. guttatus</i>       | 745       | ATNNFDQANI ICGGFGLVYKAVLSDGRKVAIAKRLSGD--FGQMEREFKAEVETLSKQHPNLVLLQGYCCKYK-DRLLIYSYMENGLDYLWHEKVD   | 839       |
| <i>S. lycopersicum</i>   | 680       | CTDNFDQSNIVCGGFGLVYKALLRDGRKVAIAKRLSGD--YQQMEREFQAEVESLSRAQHPNLVHLQGYCYKRT-DRLLIYSYMENGLDYLWHEKVD   | 774       |
| <i>S. tuberosum</i>      | 726       | CTDNFDQSNIVCGGFGLVYKALLRDGRKVAIAKRLSGD--YQQMEREFQAEVESLSRAQHPNLVHLQGYCCKHRT-DRLLIYSYMENGLDYLWHEKVD  | 820       |
| <i>V. vinifera</i>       | 513       | STNNFDQANI ICGGFGLVYKANLPDGRKVAIAKRLSGD--CGQMEREFQAEVETLSRAQHPNLVLLQGYCYRIGN-DRLLIYSYMENGLDYLWHERVD | 607       |
| <i>E. grandis</i>        | 729       | ATNNFDQANI ICGGFGMVKYKALFPDGTKLAIAKLLSGD--CGQMEREFQAEVETLSRAQHPNLVLLQGYCMTD-DRLLIYSYMENGLDYLWHEKPD  | 823       |
| <i>P. trichocarpa</i>    | 743       | FTNNFDQANI ICGGFGLVYKALLPDGRKVAIAKRLSGD--SGQMDREFQAEVETLSRAQHPNLVHLQGYCMLKN-DRLLIYSYMENGLDYLWHEKLD  | 837       |
| <i>L. usitatissimum</i>  | 767       | ATNNFDQANI ICGGFGLVYKALPDGRKVAIAKRLSGD--CGQMDREFQAEVETLSRAQHPNLVLLQGYCCKHGS-DRLLIYSYMENGLDYLWHEKVD  | 861       |
| <i>M. esculenta</i>      | 743       | STNNFDQANI ICGGFGLVYKALLPDGRKVAIAKRLSGD--CGQMEREFQAEVETLSRAQHPNLVHLQGYCMFKA-DRLLIYSYMENGLDYLWHEKID  | 837       |
| <i>R. communis</i>       | 728       | STNNFDQANI ICGGFGLVYKALLPDGRKVAIAKRLSGD--CGQMEREFQAEVETLSRAQHPNLVHLQGYCMFKN-DRLLIYSYMENGLDYLWHEKID  | 822       |
| <i>C. papaya</i>         | 631       | STNNFDQANI ICGGFGLVYKALLPDRKVAIAKRLSGD--CGQMDREFQAEVETLSRAQHPNLVLLQGYCMHKN-DRLLIYSYMENGLDYLWHEKID   | 725       |
| <i>G. raimondii</i>      | 728       | STNNFDQANI ICGGFGLVYKALLPDGRKVAIAKRLSGD--CGQMDREFQAEVETLSRAQHPNLVHLQGYCMHKN-DRLLIYSYMENGLDYLWHEKVD  | 822       |
| <i>T. cacao</i>          | 730       | STNNFDQANI ICGGFG-----GLMDREFQAEVETLSRAQHPNLVHLQGYCMHKG-DRLLIYSYMENGLDYLWHEKVD                      | 801       |
| <i>A. lyrata</i>         | 730       | STNSFDQANI ICGGFGMVKYKALLPDGKVAIAKLLSGD--CGQIEREFQAEVETLSRAQHPNLVLLRGFCFYKN-DRLLIYSYMENGLDYLWHERND  | 824       |
| <i>A. thaliana</i>       | 730       | STNSFDQANI ICGGFGMVKYKALLPDGKVAIAKLLSGD--CGQIEREFQAEVETLSRAQHPNLVLLRGFCFYKN-DRLLIYSYMENGLDYLWHERND  | 824       |
| <i>B. stricta</i>        | 740       | STNSFDQANI ICGGFGMVKYKALLPDGKVAIAKLLSGD--CGQIEREFQAEVETLSRAQHPNLVLLRGFCFYKN-DRLLIYSYMENGLDYLWHERND  | 834       |
| <i>B. rapa</i>           | 737       | STNNFDQANI ICGGFGLVYKALPDGRKVAIAKRLSGD--CGQIEREFQAEVETLSRAQHPNLVLLQGYCFYKT-DRLLIYSYMENGLDYLWHERND   | 831       |
| <i>C. grandiflora</i>    | 724       | STNSFDQANI ICGGFGMVKYKALLPDGKVAIAKLLSGD--CGQIEREFQAEVETLSRAQHPNLVLLRGFCFYRN-DRLLIYSYMENGLDYLWHERND  | 818       |
| <i>C. rubella</i>        | 738       | STNSFDQANI ICGGFGMVKYKALLPDGKVAIAKLLSGD--CGQIEREFQAEVETLSRAQHPNLVLLRGFCFYRN-DRLLIYSYMENGLDYLWHERND  | 832       |
| <i>E. salsugineum</i>    | 738       | STNNFDQANI ICGGFGLVYKALLPDGRKVAIAKRLSGD--CGQIEREFQAEVETLSRAQHPNLVLLQGYCFYKT-DRLLIYSYMENGLDYLWHERND  | 832       |
| <i>C. sinensis</i>       | 740       | STNNFDQANI ICGGFGLVYKALLPDGRNVAIAKRLSGD--CGQMEREFQAEVETLSRAQHPNLVHLQGYCMHKN-DRLLIYSYMENGLDYLWHEKLD  | 834       |
| <i>C. clementina</i>     | 740       | STNNFDQANI ICGGFGLVYKALLPDGRNVAIAKRLSGD--CGQMEREFQAEVETLSRAQHPNLVHLQGYCMHKN-DRLLIYSYMENGLDYLWHEKLD  | 834       |
| <i>C. sativus</i>        | 415       | STNNFDQANI ICGGFGLVYKALPDGRKVAIAKRLSGD--CGQMEREFQAEVETLSRAQHPNLVLLQGYCYRIGN-DRLLIYSYMENGLDYLWHEKPD  | 509       |
| <i>G. max</i>            | 773       | STNNFDQANI ICGGFGLVYKALPNGKAAVRLSGD--CGQMEREFQAEVETLSRAQHPNLVSLKGYCRHGN-DRLLIYSYLENGSLDYLWHEKVD     | 867       |
| <i>M. domestica</i>      | 738       | STNNFDQANI ICGGFGLVYKALPDGKVAIAKRLSGD--CGQMDREFQAEVETLSRAQHPNLVPLQGYCYTYKS-DRLLIYSYMENGLDYLWHEKID   | 832       |
| <i>M. truncatula</i>     | 770       | ATSNFNQANI ICGGFGLVYKALPNGKAAVRLSGD--CGQMEREFQAEVETLSRAQHPNLVSLKGYCRHGN-DRLLIYSYLENGSLDYLWHEKVD     | 864       |
| <i>P. vulgaris</i>       | 769       | STNNFDQANI ICGGFGLVYKALPNGKAAVRLSGD--CGQMEREFQAEVETLSRAQHPNLVSLKGYCRHGN-DRLLIYSYLENGSLDYLWHEKID     | 863       |
| <i>P. persica</i>        | 739       | STNNFDQANI ICGGFGLVYKALLPDGKVAIAKRLSGD--CGQMDREFQAEVETLSRAQHPNLVHLQGYCYTYKS-DRLLIYSYMENGLDYLWHEKID  | 833       |



|                          |      | CaM binding site |                                 | Activation segment |                     |          |            |                |      |
|--------------------------|------|------------------|---------------------------------|--------------------|---------------------|----------|------------|----------------|------|
| <i>A. thaliana</i>       | 825  | GPALLKWKTRLR     | IAQGAAGLLYLHEGCDPHILHRDIKS      | SNILLDENFN         | SHLADFLGLARLMS-PYE  | THVSTDLV | GLYIPPEYQA | AVATYKGDVY     | 920  |
| <i>P. patens</i>         | 1165 | AVEHLDWAKRFK     | IAMGSRGLNLFHHGFIPHIHRDIKA       | NVLLDADFE          | PRVADFLGLARLIS-AYE  | THVSTDL  | GLYIPPEYQ  | SWRSTTRGDVY    | 1260 |
| <i>S. moellendorffii</i> | 867  | GGSRLLWRHRL      | LAIRLRETARGLLEYLHRGNPHIVHRDIKS  | SNILLDGLD          | RAHVADFLGLARLML-PSD | THVSTDL  | GLYIPPEYA  | QASLEASLRGDVY  | 962  |
| <i>A. trichopoda</i>     | 854  | GGSMLDWASRL      | MAQGAAGHGLAYLHQTCENPILHRDIKS    | SNILLDEEF          | EAHLADFLGLARLIL-PYD | THVSTDL  | GLYIPPEYQ  | AVATFKGDVY     | 949  |
| <i>B. distachyon</i>     | 862  | GPKLSWQRR        | LQIAKGAARGLAYLHLSCQPHILHRDIKS   | SNILLDENF          | EAQLADFLGLARLIC-PYD | THVSTDL  | GLYIPPEYQ  | AVATFKGDVY     | 957  |
| <i>O. sativa</i>         | 861  | GPSRLSWQTR       | LQIAKGAARGLAYLHLSCQPHILHRDIKS   | SNILLDEDF          | EAHLADFLGLARLIC-PYD | THVSTDL  | GLYIPPEYQ  | AVANFKGDVY     | 956  |
| <i>P. virgatum</i>       | 846  | GAYALDWTR        | LRIAQGAARGLAYLHMSCDPHILHRDIKS   | SNILLDENF          | EAHLADFLGLARLIC-AYE | THVSTDL  | GLYIPPEYQ  | ASVPATYKGDY    | 941  |
| <i>S. italica</i>        | 860  | GPSRLIWP         | RQLQIAKGAARGLAYLHLSCQPHILHRDIKS | SNILLDENF          | EAHLADFLGLARLIC-PYA | THVSTDL  | GLYIPPEYQ  | AVATFKGDVY     | 955  |
| <i>S. bicolor</i>        | 858  | GPSRLIWP         | RQLQIAKGAARGLAYLHLSCQPHILHRDVKS | SNILLDENF          | EAHLADFLGLARLIC-PYA | THVSTDL  | GLYIPPEYQ  | AVATFKGDVY     | 953  |
| <i>Z. mays</i>           | 860  | GPSRLIWP         | RQLQIAKGAARGLAYLHLSCQPHILHRDIKS | SNILLDENF          | EAHLADFLGLARLIC-PYA | THVSTDL  | GLYIPPEYQ  | AVATFKGDVY     | 955  |
| <i>A. coerulea</i>       | 829  | GAYALDWTR        | LRIAQGAARGLAYLHQSCPHILHRDVKS    | SNILLDENF          | VAHLADFLGLARLIL-PYD | THVSTDL  | GLYIPPEYQ  | AVATFKGDVY     | 924  |
| <i>M. guttatus</i>       | 840  | GPTSLDWET        | RNLIAKGAARGLAYLHQSCPHILHRDIKS   | SNILLNEKF          | EAHLADFLGLARLIL-PYD | THVSTDL  | GLYIPPEYQ  | AVATYKGDVY     | 935  |
| <i>S. lycopersicum</i>   | 775  | GPALLDWD         | LRLQIAQGAARGLAYLHLACPHILHRDIKS  | SNILLDENF          | EAHLADFLGLARIIR-PYD | THVSTDL  | GLYIPPEYQ  | AVATYKGDVY     | 870  |
| <i>S. tuberosum</i>      | 821  | GPALLDWD         | LRLQIAQGAARGLAYLHLACDPHILHRDIKS | SNILLDENF          | EAHLADFLGLARIIR-PYD | THVSTDL  | GLYIPPEYQ  | AVATYKGDVY     | 916  |
| <i>V. vinifera</i>       | 608  | GSMLLDWTR        | LRIAQGAARGLAYLHQSCPHILHRDIKS    | SNILLDENF          | EAHLADFLGLARLLR-PYD | THVSTDL  | GLYIPPEYQ  | ASQTATFKGDVY   | 703  |
| <i>E. grandis</i>        | 824  | GPCLLDWCK        | RRLRIAQGAARGLAYLHQSCPHIVHRDVKS  | SNILLDGNF          | EAHLADFLGLARLIR-AYD | THVSTDL  | GLYIPPEYQ  | AVATCKGDVY     | 919  |
| <i>P. trichocarpa</i>    | 838  | GPSSLDWTR        | LQIAQGAARGLAYLHQSCPHIVHRDIKS    | SNILLDENF          | VAHLADFLGLARLIL-PYD | THVSTDL  | GLYIPPEYQ  | AAVATYMGDVY    | 933  |
| <i>L. usitatissimum</i>  | 862  | GPSVLQW          | EARLKIAGKAAGLAYLHKVCEPHIVHRDVKS | SNILLDDKF          | EAHLADFLGLARLLR-PYD | THVSTDL  | GLYIPPEYQ  | ASQTATCRGDVY   | 957  |
| <i>M. esculenta</i>      | 838  | GPSMLDWTR        | LRIAQGAARGLAYLHQSCPHILHRDIKS    | SNILLDENF          | EAHLADFLGLARLIL-PSD | THVSTDL  | GLYIPPEYQ  | AVATYKGDVY     | 933  |
| <i>R. communis</i>       | 823  | GPTLLDWV         | TRLQIAQGAARGLAYLHQSCPHILHRDIKS  | SNILLNENF          | EAHLADFLGLARLIL-PYD | THVSTDL  | GLYIPPEYQ  | AVATYKGDVY     | 918  |
| <i>C. papaya</i>         | 726  | GLSSLDWN         | TRIQIAGAARGLAYLHQSCPHILHRDIKS   | SNILLDENF          | EAHLADFLGLARLIL-PYD | THVSTDL  | GLYIPPEYQ  | AVATYKGDVY     | 821  |
| <i>G. raimondii</i>      | 823  | GPSLLSWET        | RKLIAQGAARGLAYLHQSCPHILHRDIKS   | SNILLDENF          | KAHLADFLGLARLIL-PYD | THVSTDL  | GLYIPPEYQ  | AVATYKGDVY     | 918  |
| <i>T. cacao</i>          | 802  | GPSLLDWTR        | LQIALGAARGLAYLHQSCPHILHRDIKS    | SNILLDENF          | EAHLADFLGLARLIL-PYD | THVSTDL  | GLYIPPEYQ  | AVATYKGDVY     | 897  |
| <i>A. lyrata</i>         | 825  | GPALLKWR         | TRLRIAQGAAGLLYLHEGCDPHILHRDIKS  | SNILLDENF          | FNHLADFLGLARLMS-PYE | THVSTDL  | GLYIPPEYQ  | AVATYKGDVY     | 920  |
| <i>A. thaliana</i>       | 825  | GPALLKWK         | TRLRIAQGAAGLLYLHEGCDPHILHRDIKS  | SNILLDENF          | FNHLADFLGLARLMS-PYE | THVSTDL  | GLYIPPEYQ  | AVATYKGDVY     | 920  |
| <i>B. stricta</i>        | 835  | GPALLKWK         | TRLRIAQGAAGLLYLHEACDPHILHRDIKS  | SNILLDENF          | DSHLADFLGLARLLS-PYE | THVSTDL  | GLYIPPEYQ  | AVATYKGDY      | 930  |
| <i>B. rapa</i>           | 832  | GPALLDWTR        | LRIAQGAARGLAYLHQSCPHILHRDIKS    | SNILLDENF          | EAHLADFLGLARLMS-PYE | THVSTDL  | GLYIPPEYQ  | AVATYKGDVY     | 927  |
| <i>C. grandiflora</i>    | 819  | GPALLNWR         | TRLRIAQGAAGLLYLHEACDPHILHRDIKS  | SNILLDENF          | TSHLADFLGLARLMS-PYE | THVSTDL  | GLYIPPEYQ  | AVATYKGDY      | 914  |
| <i>C. rubella</i>        | 833  | GPALLNWR         | TRLRIAQGAAGLLYLHEACDPHILHRDIKS  | SNILLDENF          | TSHLADFLGLARLMS-PYE | THVSTDL  | GLYIPPEYQ  | AVATYKGDY      | 928  |
| <i>E. salusigneum</i>    | 833  | GPALLDWTR        | LRIAQGAARGLAYLHQSCPHILHRDIKS    | SNILLDENF          | EAHLADFLGLARLMS-PYE | THVSTDL  | GLYIPPEYQ  | AVATYKGDVY     | 928  |
| <i>C. sinensis</i>       | 835  | GPSLLDWTR        | LRIAQGAARGLAYLHQSCPHILHRDIKS    | SNILLDGNF          | EAHLADFLGLARLILSPYD | THVSTDL  | GLYIPPEYQ  | AVATYKGDVY     | 931  |
| <i>C. clementina</i>     | 835  | GPSLLDWTR        | LRIAQGAARGLAYLHQSCPHILHRDIKS    | SNILLDGNF          | EAHLADFLGLARLILSPYD | THVSTDL  | GLYIPPEYQ  | AVATYKGDVY     | 931  |
| <i>C. sativus</i>        | 510  | GSSCLDWTR        | LQIARGAAGLAYLHQSCPHILHRDIKS     | SNILLDKNF          | KAHLADFLGLARLIL-PYD | THVSTDL  | GLYIPPEYQ  | AVATYRGDVY     | 605  |
| <i>G. max</i>            | 868  | ENSALKWDS        | RLKVAQGAARGLAYLHKCEPPIVHRDVKS   | SNILLDDNF          | EAHLADFLGLARLLQ-PYD | THVSTDL  | GLYIPPEYQ  | ASQTATATFRGDVY | 963  |
| <i>M. domestica</i>      | 833  | GPTSLDWTR        | LRIAQGAARGLAYLHQSCPHILHRDIKS    | SNILLDENF          | KAHLADFLGLARLIH-PYA | THVSTDL  | GLYIPPEYQ  | AVATYKGDVY     | 928  |
| <i>M. truncatula</i>     | 865  | GNSALKWDR        | LKIAQGAARGLAYLHKCEPPIVHRDIKS    | SNILLDKNF          | EAHLADFLGLARLLS-PYD | THVSTDL  | GLYIPPEYQ  | ASQTATATFRGDVY | 960  |
| <i>P. vulgaris</i>       | 864  | ESALKWDAR        | LKIAQGAARGLAYLHKCEPPIVHRDVKS    | SNILLDDKF          | EAHLADFLGLARLLQ-PYD | THVSTDL  | GLYIPPEYQ  | ASQTATATFRGDVY | 959  |
| <i>P. persica</i>        | 834  | GPSLLDWN         | MRLQIAQGAARGLAYLHQSCPHILHRDIKS  | SNILLDENF          | KAHLADFLGLARLIL-PYD | THVSTDL  | GLYIPPEYQ  | AVATYKGDVY     | 929  |

|                          |      | GC centre  |                                                                                       |      |
|--------------------------|------|------------|---------------------------------------------------------------------------------------|------|
| <i>A. thaliana</i>       | 921  | SFGVLLLELL | TDKRP--VDMCKPKGCRDLISWVVKMKHEPRASEVFDPLIYSKENDK---EMFRVLEIACLCLSENPKQRPTIQQLVSWLDDV   | 1008 |
| <i>P. patens</i>         | 1261 | SYGVILLELL | TGKEPTGSDVKDYHEGGLNVQWARQMIKAGNAADVLDPIVSDGPWKC---KMLKVLHIANMCTAEDPVKRPMSLQVVKLLKDV   | 1350 |
| <i>S. moellendorffii</i> | 963  | SFGVLLVLE  | VLRRRP--VDACRRGGIRDLPVWVEGMQATGRGIEIVDPLLLQNYSEVDALEEMLRVLDVACVYCDSCQRRPGIEEVAWLDVAV  | 1054 |
| <i>A. trichopoda</i>     | 950  | SFGVLLLELL | TGKRP--VDVCKPKGCRDLISWVILQKSEGREEVDFPFYDKKHDK---QMLQMLEVACSLCNVACPARKPFTICQVSWLSDSI   | 1037 |
| <i>B. distachyon</i>     | 958  | SFGVLLLELL | TGKRP--VDMCKPKGARELISWVIMHKGENREADVLDAMYKKEKYEI---QMMKMIACLCISSEPKLRPLSHLVLWIDTI      | 1045 |
| <i>O. sativa</i>         | 957  | SFGVLLLELL | TGKRP--VDMCKPKGARELISWVLMHMEKNECEAEVLDAMYDKKFKEM---QMVQMIACLCISSEPKLRPLSHLVLWLDNI     | 1044 |
| <i>P. virgatum</i>       | 942  | SFGVLLLELL | TGRRP--VDMCRPKGTRDVLVSWVLMQKEEGRETEVFFHPSIHHKENES---QLIRVLEIACLCVSAAPKSRPTIQQLVWLDVI  | 1029 |
| <i>S. italica</i>        | 956  | SFGVLLLELL | TGKRP--VDMCKPKGARELISWVTHMKENRETVDLDRAMYDKKFEK---EMMQMIDVACLCVSDSPKLRPLSHLVLWLDNI     | 1043 |
| <i>S. bicolor</i>        | 954  | SFGVLLLELL | TGKRP--VDMCKPKGARELISWVTHMKENREADVLDAMYDKKFKET---QMIQMIACLCISSEPKLRPLSHLVLWLDNI       | 1041 |
| <i>Z. mays</i>           | 956  | SFGVLLLELL | TGKRP--IDMCKPKGARELISWVTLMKENREADVLDAMYDKKFKET---QMRQVIDIACLCVSDSPKLRPLSHLVMWLDNI     | 1043 |
| <i>A. coerulea</i>       | 925  | SFGVLLLELL | TGKRP--MDMCKPKDRRLNISWVFMKKEKREAEVIDPFIYDKQHDK---EILRALEIACLCISESPKVRPSIQQIVSWLNI     | 1012 |
| <i>M. guttatus</i>       | 936  | SFGVLLLELL | TGKRP--MDMCKPKGCRDLISWVIRMKENRESEVDFPFYDKKHDK---EMLRKRW-----EMLRKRW-----              | 992  |
| <i>S. lycopersicum</i>   | 871  | SFGVLLLELL | TCKRP--MDPCKPRASDLISWVIQMKKQKRETEVDFPLIYDKQHAK---EMLLVLEIACLCISESPKIRPSSIQQLVWLDNI    | 958  |
| <i>S. tuberosum</i>      | 917  | SFGVLLLELL | TCKRP--MDPCKPRASDLISWVIQMKKQKRETEVDFPLIYDKQHAK---EMLLVLEIACLCISESPKIRPSSIQQLVWLDNI    | 1004 |
| <i>V. vinifera</i>       | 704  | SFGVLLLELL | TGRRP--VEVCKGKNCRDLSWVFMKSEKKEEQIMDSVWVDKREK---QFLEVLIACRCIDQDPQRPSIDQVSWLDVAV        | 791  |
| <i>E. grandis</i>        | 920  | SFGVLLLELL | TGKRP--MDMCKPKGSRDLISWVIRMKENRESEVDFPFYDKQHDK---EILRVEIACLCISESPKVRPSIQQLVSWLDG-      | 1006 |
| <i>P. trichocarpa</i>    | 934  | SFGVLLLELL | TGKRP--MDMCKPKGSRDLISWVIQMKKENRESEVDFPFYDKQHDK---ELQRVLEIARLCLSEYPKLRPSIQQLVSWLDNI    | 1021 |
| <i>L. usitatissimum</i>  | 958  | SFGVLLLELL | TCKRP--VEVCKGKSCRDLSWVFMKFEKRVSEIIDASVWVDKQDEK---QLVEMLEIACRCIDHERRRPFIEEVSCLDGI      | 1045 |
| <i>M. esculenta</i>      | 934  | SFGVLLLELL | TGKRP--MDMCKPKGSRDLISWVIQMKKENRESEVDFPFYDKQHDK---QLLQVFDIACLCISESPKVRPSITQLVSWLENT    | 1021 |
| <i>R. communis</i>       | 919  | SFGVLLLELL | TGKRP--MDMCKPKGSRDLISWVIQMKKENRESEVDFPFYDKQHDK---QLLQVLDIACLCISESPKVRPSITQLVSWLDGI    | 1006 |
| <i>C. papaya</i>         | 822  | SFGVLLLELL | TGKRP--MDMCKPKGSRDLISWAIQMKKENRESEVDFPFYDKQHDK---EMCLVLIACLCISECPKVRPTIQQLVSWLDNI     | 909  |
| <i>G. raimondii</i>      | 919  | SFGVLLLELL | TGKRP--MDMCKPKGTRDLISWVIRMKMENRESEVDFPFYDKQHDK---EMLRILEIACLCISESPKIRPTIQQLVYWLKDV    | 1006 |
| <i>T. cacao</i>          | 898  | SFGVLLLELL | TGKRP--MDMCKPKGSRDLISWVIRMKIENRESEVDFPFYDKQHDK---EMLRVEIACLCISESPKVRPTIQQLVSWLCKV     | 985  |
| <i>A. lyrata</i>         | 921  | SFGVLLLELL | TDKRP--VDMCKPKGCRDLISWVVKMKHENRASEVDFPLIYSKENDK---EMFRVLEITCLCLSENPKQRPTIQQLVSWLDDV   | 1008 |
| <i>A. thaliana</i>       | 921  | SFGVLLLELL | TDKRP--VDMCKPKGCRDLISWVVKMKHEPRASEVFDPLIYSKENDK---EMFRVLEIACLCISESPKQRPTIQQLVSWLDDV   | 1008 |
| <i>B. stricta</i>        | 931  | SFGVLLLELL | TDKRP--VDMCKPKGCRDLISWVVKMKHENRASEVDFPLIYSKENDK---EMFRVLEIACLCISESPKQRPTIQQLVSWLHDV   | 1018 |
| <i>B. rapa</i>           | 928  | SFGVLLLELL | TDKRP--VDMCKPKGARELISWVVKMKSEGRASEVDFPFYDKQVNEE---EMFRVLEIACLCISESHNPKLRPTIQQLVSWLDDV | 1015 |
| <i>C. grandiflora</i>    | 915  | SFGVLLLELL | TGKRP--VDMCKPKGSRDLISWVVKMKHENRASEVDFPLIYSKENEK---EMLRVEIACLCISESPKVRPTIQQLVSWLDDV    | 1002 |
| <i>C. rubella</i>        | 929  | SFGVLLLELL | TDKRP--VDMCKPKGSRDLISWVVKMKYENRASEVDFPLIYSKENEK---EMLRVEIACLCISESPKVRPTIQQLVSWLDDV    | 1016 |
| <i>E. salusigneum</i>    | 929  | SFGVLLLELL | TDKRP--VDMCKPKGSRDLISWVVKMKHENRASEVDFPLIYSKENEK---EMLRVEIACLCISESPKVRPTIQQLVSWLDDV    | 1016 |
| <i>C. sinensis</i>       | 932  | SFGVLLLELL | TGKRP--MDMCKPKGSRDLISWVIRMQENRESEVDFPFYDKQHDK---EMLRVLDIACLCISESPKVRPTIQQLVSWLSDI     | 1019 |
| <i>C. clementina</i>     | 932  | SFGVLLLELL | TGKRP--MDMCKPKGSRDLISWVIRMQENRESEVDFPFYDKQHDK---EMLRVLDIACLCISESPKVRPTIQQLVSWLSDI     | 1019 |
| <i>C. sativus</i>        | 606  | SFGVLLLELL | TGKRP--IDMCRPKGLRDLISWVFMKDKKVESEVDFPFYDKQVNEE---AMVEVLDIACLCISECPKVRPSIQQLVWLDK      | 693  |
| <i>G. max</i>            | 964  | SFGVLLLELL | TGRRP--VEVIKGNCRNLVSWVYQMKSENKEQIFDPFVIYDKHDEK---QLLEVLAIACCLNQDPRQRPSIEIVVSWLSDV     | 1051 |
| <i>M. domestica</i>      | 929  | SFGVLLLELL | TGKRP--MDMCKPKCRDLISWVFMKREKKESEVDFPFYDKQHDK---ELLCVFEIACLCISESPKVRPSIQQLVWLDNI       | 1016 |
| <i>M. truncatula</i>     | 961  | SFGVLLLELL | TARRP--VEVVIKGNCRNLVSWVYQMKYENKEQIFDQTIWEKREK---QLLEVLAIACCLNQDPRQRPSIEIVVSWLSDV      | 1048 |
| <i>P. vulgaris</i>       | 960  | SFGVLLLELL | TGRRP--VEVIKGNCRNLVSWVYQMKSENKEQIFDPAIYDKHDEK---QLLEVLAIACCLNQDPRQRPSIEIVVSWLSDV      | 1047 |

|                          |      |                              |      |
|--------------------------|------|------------------------------|------|
| <i>A. thaliana</i>       |      | -----                        |      |
| <i>P. patens</i>         | 1351 | EMSSQLSTHDDAQ-----           | 1363 |
| <i>S. moellendorffii</i> | 1055 | GSSRLKVGLGKP-----            | 1066 |
| <i>A. trichopoda</i>     | 1038 | GADSQQT-----                 | 1045 |
| <i>B. distachyon</i>     | 1046 | DTSGEAIN-----                | 1053 |
| <i>O. sativa</i>         | 1045 | GGSTEATK-----                | 1052 |
| <i>P. virgatum</i>       | 1030 | AEDSVLEQPEVSGGFNLLA-----     | 1048 |
| <i>S. italica</i>        | 1044 | GVSSDAPK-----                | 1051 |
| <i>S. bicolor</i>        | 1042 | GVTS DAPK-----               | 1049 |
| <i>Z. mays</i>           | 1044 | GVTSDEPK-----                | 1051 |
| <i>A. coerulea</i>       | 1013 | DTYGP-----                   | 1017 |
| <i>M. guttatus</i>       |      | -----                        |      |
| <i>S. lycopersicum</i>   | 959  | NTPPDVHVF-----               | 967  |
| <i>S. tuberosum</i>      | 1005 | NTPPDVHVF-----               | 1013 |
| <i>V. vinifera</i>       | 792  | GKEGVLPLFIAFEISSFSFFLS-----  | 813  |
| <i>E. grandis</i>        |      | -----                        |      |
| <i>P. trichocarpa</i>    | 1022 | DTNT-----                    | 1025 |
| <i>L. usitatissimum</i>  | 1046 | GDT-----                     | 1048 |
| <i>M. esculenta</i>      | 1022 | DISTA-----                   | 1026 |
| <i>R. communis</i>       | 1007 | DNT-----                     | 1010 |
| <i>C. papaya</i>         | 910  | ETTSSILIM-----               | 918  |
| <i>G. raimondii</i>      | 1007 | TSLSSV-----                  | 1012 |
| <i>T. cacao</i>          | 986  | DISI-----                    | 989  |
| <i>A. lyrata</i>         |      | -----                        |      |
| <i>A. thaliana</i>       |      | -----                        |      |
| <i>B. stricta</i>        |      | -----                        |      |
| <i>B. rapa</i>           |      | -----                        |      |
| <i>C. grandiflora</i>    |      | -----                        |      |
| <i>C. rubella</i>        |      | -----                        |      |
| <i>E. salsugineum</i>    |      | -----                        |      |
| <i>C. sinensis</i>       | 1020 | I-----                       |      |
| <i>C. clementina</i>     | 1020 | I-----                       |      |
| <i>C. sativus</i>        | 694  | TFYNQPYTPHNKFFVSLVYISTFFSSLN | 721  |
| <i>G. max</i>            | 1052 | RFDGSQQ-----                 | 1058 |
| <i>M. domestica</i>      | 1017 | NTKKV-----                   | 1021 |
| <i>M. truncatula</i>     | 1049 | KVDGFQQ-----                 | 1055 |
| <i>P. vulgaris</i>       | 1048 | RFDGSQQ-----                 | 1054 |
| <i>P. persica</i>        | 1018 | STKN-----                    | 1021 |

**Supplemental Figure S4.** Alignment of PSKR1 orthologs from higher plants and mosses. The intracellular sequences from 37 LRR-RLKs with highest similarity to Arabidopsis PSKR1 were identified from the Phytozome database. The positions of the phosphorylation sites identified in *Arabidopsis thaliana* PSKR1 are indicated. Green denotes sites identified in PSKR1 *in planta* and magenta those identified *in vitro*. Indicated in blue is the T890 that is also transphosphorylated by *E. coli*. Squares indicate unambiguous residues whereas circles indicate phosphorylation sites whose position was not confirmed. Red indicates a conserved residue at the respective position in PSKR1 orthologs and yellow a functionally conserved S/T or Y residue in PSKR1 orthologs.



# Supplemental Figure S5

|                                   |       |     |                                                                                                                                     |     |
|-----------------------------------|-------|-----|-------------------------------------------------------------------------------------------------------------------------------------|-----|
| <i>Arabidopsis thaliana</i>       | PSKR1 | 681 | RARRRSGEVDPPEI---EES <b>SSM</b> -----NRKELGEIGSKLVVLFQ <b>S</b> ---NDKELSYDLLLLD                                                    | 729 |
| <i>Physcomitrella patens</i>      |       | 817 | EVEAKDLEKAKLNMNMTLDPCS----LSLDKMKEPLSINVAMFEQ--PLLRLTLADVLR                                                                         | 869 |
| <i>Selaginella moellendorffii</i> |       | 721 | SFSRRAR-AGHRQD----IAGRN----FKEMSVQMMDLTVMFQ--RYRRITVGDLLK                                                                           | 768 |
| <i>Amborella trichopoda</i>       |       | 650 | HMSRKE--ERYQNGEVVDSR----SHRPSEFSGSKLVLLFQ <b>N</b> -PEGMELTINDLLK                                                                   | 700 |
| <i>Brachypodium distachyon</i>    |       | 690 | NISKGE--ASAI <b>S</b> D---EDAEG----DCHDPYYSYKPVLF <b>F</b> EN-S-AKELTVSDLLK                                                         | 736 |
| <i>Oryza sativa</i>               |       | 711 | NISKRE--VSIIDD---EEING----SCHDSYD-YWKPVLFFQD-S-AKELTVSDLLK                                                                          | 756 |
| <i>Panicum virgatum</i>           |       | 586 | NMSKRE--VSAIDY---EDTEG----SCHELYDSYLKPVLF <b>F</b> Q <b>N</b> -SAVKELTVSDLV <b>R</b>                                                | 633 |
| <i>Setaria italica</i>            |       | 695 | NMSKRE--VSAIDY---EETEG----SCHELYDSYKPVLF <b>F</b> Q <b>N</b> -SAVKELTVSDLV <b>R</b>                                                 | 742 |
| <i>Sorghum bicolor</i>            |       | 703 | NMSKRE--VTAIDY---EDTEG----SSHELYDTYKPVLF <b>F</b> Q <b>N</b> -STVKELTVSDLV <b>R</b>                                                 | 750 |
| <i>Zea mays</i>                   |       | 696 | NMSKRE--VSAIEHE--EDTEG----SCHELYGSYKPVLF <b>F</b> Q <b>N</b> -SAVKELTVSDLV <b>R</b>                                                 | 744 |
| <i>Aquilegia coerulea</i>         |       | 713 | KISRKD-VRY <b>P</b> MD---DVEENF-CRSNRFS-EALGSSKLV <b>L</b> FQ <b>N</b> -SESKELTIGD <b>L</b> LK                                      | 764 |
| <i>Mimulus guttatus</i>           |       | 702 | RVSRKD-NRAPVE---DLEEEED-----SRTTGQPK-MVIFKN-ADFKDLTVSD <b>L</b> LK                                                                  | 747 |
| <i>Solanum lycopersicum</i>       |       | 685 | RVSRRD-AGHQIG---DFEEDFSR--PPRSSDTFV <b>P</b> SK-LVLFQ <b>N</b> -SDCKELTVAD <b>L</b> LK                                              | 735 |
| <i>Solanum tuberosum</i>          |       | 712 | RVSRRD-AGHQIG---DFEEDFSR--PPRSSDTFV <b>P</b> SK-LVLFQ <b>N</b> -SDCKELTVAD <b>L</b> LK                                              | 762 |
| <i>Vitis vinifera</i>             |       | 462 | EVYIPY-VGDPIV---DLDEEIT-SRPHRLS-EVLGSSK-LVLFQ <b>N</b> -SGCKDLTVAD <b>L</b> LK                                                      | 512 |
| <i>Eucalyptus grandis</i>         |       | 715 | KILRRD-VNDHID---DLHEEL-GRPHRLS-GTLESSK-LVLF <b>P</b> N-SDCKDLTVAD <b>L</b> LK                                                       | 765 |
| <i>Populus trichocarpa</i>        |       | 715 | KMSRRN-VGDP <b>I</b> G---DLEEEG- <b>S</b> LPHRLS-EALRSSK-LVLFQ <b>N</b> -SDCKELSVAD <b>L</b> LK                                     | 765 |
| <i>Linum usitatissimum</i>        |       | 716 | MMSRRA-RGDLIN---NLDEEG-SESQRSS-QALMTSK-LVLFQ <b>N</b> -SDCKDLTV <b>D</b> L <b>L</b> K                                               | 766 |
| <i>Manihot esculenta</i>          |       | 716 | KMSKRD-VGDP <b>I</b> E---DLDEEV-SWPHRLS-EGLGSSK-LVLFQ <b>N</b> -SECKDLTVAD <b>L</b> LK                                              | 766 |
| <i>Ricinus communis</i>           |       | 714 | KISRDRYVGD <b>P</b> FD---DLDEEV-SRPHRLS-EALGSSK-LVLFQ <b>N</b> -SDCKDLTVAD <b>L</b> LK                                              | 765 |
| <i>Carica papaya</i>              |       | 583 | RAHSR-GEVDPER---DFDEG-----NEKDLEELGSRLV <b>V</b> L <b>F</b> Q <b>N</b> KEDNKDLS <b>F</b> DD <b>L</b> LK                             | 630 |
| <i>Gossypium raimondii</i>        |       | 716 | RMSKRD-VGSTVD---NLDEEL-SRSHRLS-EALGSSK-LVLFQ <b>S</b> -SNCKELTV <b>D</b> L <b>L</b> K                                               | 766 |
| <i>Theobroma cacao</i>            |       | 716 | RMSRRD-VGDPID---DLDEEL-SRSHRLS-EALGSSK-LVLFQ <b>S</b> -SNCKELTV <b>D</b> L <b>L</b> K                                               | 766 |
| <i>Arabidopsis lyrata</i>         |       | 701 | RISRKD-SDRIN---DVDEET---ISGVPKALG <b>P</b> SK-I <b>V</b> LF <b>H</b> S-CGCKDLS <b>V</b> E <b>L</b> LK                               | 749 |
| <i>Arabidopsis thaliana</i>       |       | 701 | RISRKD-VDRIN---DVDEET---ISGVS <b>K</b> ALG <b>P</b> SK-I <b>V</b> LF <b>H</b> S-CGCKDLS <b>V</b> E <b>L</b> LK                      | 749 |
| <i>Boechera stricta</i>           |       | 701 | RISRKD-ADDRIN---DVDEET---ISGVPKALG <b>P</b> SK-I <b>V</b> LF <b>H</b> S-CGCKDLS <b>V</b> E <b>L</b> LK                              | 749 |
| <i>Brassica rapa</i>              |       | 674 | RLSRKE-GDRVN---DADEE-----V <b>P</b> KAPL <b>S</b> SK-I <b>V</b> LF <b>H</b> S-CGCKDLTVAD <b>L</b> LK                                | 718 |
| <i>Capsella grandiflora</i>       |       | 701 | RISRKD-ADDRIN---DVDEET---VSGVPKALG <b>P</b> SK-I <b>V</b> LF <b>H</b> S-CGCKDLS <b>V</b> E <b>L</b> LK                              | 749 |
| <i>Capsella rubella</i>           |       | 701 | RISRKD-ADDRIN---DVDEET---ISGVPKALG <b>P</b> SK-I <b>V</b> LF <b>H</b> S-CGCKDLS <b>V</b> E <b>L</b> LK                              | 749 |
| <i>Eutrema salugineum</i>         |       | 682 | RLSRKD-ADDRVN---DIDEEM---ISDV <b>P</b> KAP <b>G</b> T <b>S</b> K-I <b>V</b> LF <b>H</b> S-CGCKDLS <b>V</b> E <b>L</b> LK            | 730 |
| <i>Citrus sinensis</i>            |       | 714 | KMSRRD-SGCPID---DLDEDM-GR <b>P</b> Q <b>R</b> LS-EALASSK-LVLFQ <b>N</b> -SDCKDLTVSD <b>L</b> LK                                     | 764 |
| <i>Citrus clementina</i>          |       | 718 | KMSRRD-SGCPID---DLDEDM-GR <b>P</b> Q <b>R</b> LS-EALASSK-LVLFQ <b>N</b> -SDCKDLTVSD <b>L</b> LK                                     | 768 |
| <i>Cucumis sativus</i>            |       | 724 | KISRKD-VGDRRNR <b>F</b> DE <b>F</b> DR---ADRLSGALG <b>S</b> SK-LVLFQ <b>N</b> -SECKDLTV <b>A</b> E <b>L</b> LK                      | 775 |
| <i>Glycine max</i>                |       | 721 | KMSKRD-DDK <b>P</b> MD---NFDEELN <b>R</b> PR <b>R</b> LS-EALASSK-LVLFQ <b>N</b> -SDCKDLTVAD <b>L</b> LK                             | 772 |
| <i>Malus domestica</i>            |       | 718 | KMSRRG-AKDQID---DFDEEIT-SRPHRIS-GALASSK-LVLFQ <b>N</b> -SDCKD <b>F</b> TVSD <b>L</b> LK                                             | 767 |
| <i>Medicago truncatula</i>        |       | 717 | RMSKRE-EDK <b>P</b> ID---SFDEEMSG <b>R</b> PR <b>R</b> LS <b>S</b> EG <b>F</b> V <b>A</b> SK-LVLFQ <b>N</b> -SDCKDLTVSD <b>L</b> LK | 769 |
| <i>Phaseolus vulgaris</i>         |       | 717 | RTSRRD-DDK <b>P</b> ID---NYDEELN <b>R</b> PH <b>R</b> LS-EALV <b>S</b> SK-LVLFQ <b>N</b> -SDCKDLTVAD <b>L</b> LK                    | 768 |
| <i>Prunus persica</i>             |       | 716 | KMSRRG-VKDQ <b>N</b> D---DFDDDL-SRPHRLS-GALASSK-LVLFQ <b>N</b> -SDCKELTV <b>D</b> L <b>L</b> K                                      | 766 |

## ATP binding region

|                          |       |     |                                                                                                                                                                                                                                                                                                                                                                                          |     |
|--------------------------|-------|-----|------------------------------------------------------------------------------------------------------------------------------------------------------------------------------------------------------------------------------------------------------------------------------------------------------------------------------------------------------------------------------------------|-----|
| <i>A. thaliana</i>       | PSKR1 | 730 | STNS <b>F</b> DQANIIGCGGF <b>G</b> LVYKA <b>L</b> LPDG <b>K</b> KA <b>V</b> IKKLS <b>G</b> D <b>C</b> G--QIEREF <b>F</b> AE <b>V</b> ET <b>L</b> S <b>R</b> AQH <b>P</b> N <b>L</b> V <b>L</b> LR <b>G</b> F <b>C</b> Y <b>K</b> N-DRLLI <b>S</b> Y <b>M</b> EN <b>G</b> SL <b>D</b> Y <b>W</b> L <b>H</b> ER <b>N</b> D                                                                 | 824 |
| <i>P. patens</i>         |       | 870 | ATNGFSK <b>T</b> NIIGDGG <b>F</b> GVYKA <b>L</b> PDGR <b>I</b> V <b>A</b> IKK <b>L</b> GH <b>L</b> S--QGNRE <b>F</b> LA <b>E</b> ME <b>T</b> L <b>G</b> K <b>V</b> K <b>H</b> R <b>L</b> V <b>P</b> LL <b>G</b> Y <b>C</b> S <b>F</b> GE-EK <b>L</b> L <b>V</b> Y <b>D</b> Y <b>M</b> K <b>N</b> G <b>S</b> L <b>D</b> L <b>W</b> L <b>R</b> NR <b>A</b> D                               | 964 |
| <i>S. moellendorffii</i> |       | 769 | ATNNFDAT <b>N</b> IIGCGGF <b>L</b> VYKA <b>N</b> LPD <b>G</b> N <b>V</b> V <b>A</b> IKR <b>L</b> T <b>S</b> ED <b>G</b> GP <b>Q</b> ME <b>R</b> E <b>F</b> DA <b>E</b> L <b>T</b> SL <b>G</b> NI <b>T</b> HP <b>N</b> L <b>V</b> SL <b>E</b> GY <b>C</b> R <b>L</b> GM <b>R</b> DR <b>L</b> L <b>V</b> Y <b>S</b> Y <b>M</b> EN <b>G</b> SL <b>D</b> Y <b>W</b> L <b>H</b> ER <b>S</b> D | 866 |
| <i>A. trichopoda</i>     |       | 701 | STNNFDQ <b>A</b> NIIGCGGF <b>L</b> VYKA <b>L</b> LPD <b>N</b> T <b>K</b> AA <b>I</b> KR <b>L</b> SG <b>D</b> CG--Q <b>M</b> ER <b>E</b> F <b>R</b> AE <b>V</b> E <b>A</b> L <b>S</b> RAQH <b>K</b> N <b>L</b> V <b>S</b> LR <b>G</b> Y <b>C</b> R <b>H</b> GN-DRLLI <b>S</b> Y <b>M</b> EN <b>G</b> SL <b>D</b> Y <b>W</b> L <b>H</b> ER <b>L</b> D                                      | 853 |
| <i>B. distachyon</i>     |       | 737 | STNNFDE <b>A</b> NIIGCGGF <b>G</b> LVYKA <b>L</b> LPD <b>G</b> T <b>K</b> AA <b>V</b> KR <b>L</b> SG <b>D</b> SG--Q <b>M</b> ER <b>E</b> F <b>H</b> AE <b>V</b> E <b>A</b> L <b>S</b> QAQ <b>H</b> K <b>N</b> L <b>V</b> SL <b>R</b> GY <b>C</b> RY <b>R</b> D-DRLLI <b>Y</b> T <b>M</b> EN <b>N</b> SL <b>D</b> Y <b>W</b> L <b>H</b> ER <b>E</b> D                                     | 831 |
| <i>O. sativa</i>         |       | 757 | STNNFDQ <b>A</b> NIIGCGGF <b>L</b> VYKA <b>L</b> LPD <b>G</b> T <b>K</b> AA <b>V</b> KR <b>L</b> SG <b>D</b> CG--Q <b>M</b> ER <b>E</b> F <b>R</b> AE <b>V</b> E <b>A</b> L <b>S</b> QAQ <b>H</b> K <b>N</b> L <b>V</b> SL <b>R</b> GY <b>C</b> RY <b>G</b> N-DRLLI <b>S</b> Y <b>M</b> EN <b>N</b> SL <b>D</b> Y <b>W</b> L <b>H</b> ER <b>S</b> D                                      | 851 |
| <i>P. virgatum</i>       |       | 634 | STNNFDQ <b>A</b> NIIGCGGF <b>L</b> VYKA <b>L</b> LPD <b>G</b> T <b>K</b> AA <b>V</b> KR <b>L</b> SG <b>D</b> Y <b>G</b> --Q <b>M</b> ER <b>E</b> F <b>R</b> AE <b>V</b> E <b>A</b> L <b>S</b> QAQ <b>H</b> K <b>N</b> L <b>V</b> TL <b>R</b> GY <b>C</b> RY <b>G</b> N-DRLLI <b>S</b> Y <b>M</b> EN <b>G</b> SL <b>D</b> Y <b>W</b> L <b>H</b> ER <b>S</b> D                             | 728 |
| <i>S. italica</i>        |       | 743 | STNNFDQ <b>A</b> NIIGCGGF <b>L</b> VYKA <b>L</b> LPD <b>G</b> T <b>K</b> AA <b>V</b> KR <b>L</b> SG <b>D</b> CG--Q <b>M</b> ER <b>E</b> F <b>R</b> AE <b>V</b> E <b>A</b> L <b>S</b> QAQ <b>H</b> K <b>N</b> L <b>V</b> TL <b>R</b> GY <b>C</b> RY <b>G</b> N-DRLLI <b>S</b> Y <b>M</b> EN <b>G</b> SL <b>D</b> Y <b>W</b> L <b>H</b> ER <b>S</b> D                                      | 837 |
| <i>S. bicolor</i>        |       | 751 | STNNFDQ <b>A</b> NIIGCGGF <b>L</b> VYKA <b>L</b> LPD <b>G</b> T <b>K</b> AA <b>V</b> KR <b>L</b> SG <b>D</b> CG--Q <b>M</b> ER <b>E</b> F <b>R</b> AE <b>V</b> E <b>A</b> L <b>S</b> QAQ <b>H</b> K <b>N</b> L <b>V</b> TL <b>K</b> GY <b>C</b> RY <b>G</b> N-DRLLI <b>S</b> Y <b>M</b> EN <b>G</b> SL <b>D</b> Y <b>W</b> L <b>H</b> ER <b>S</b> D                                      | 845 |
| <i>Z. mays</i>           |       | 745 | STNNFDQ <b>A</b> NIIGCGGF <b>L</b> VYKA <b>L</b> LPD <b>G</b> T <b>K</b> AA <b>V</b> KR <b>L</b> SG <b>D</b> CG--Q <b>M</b> ER <b>E</b> F <b>R</b> AE <b>V</b> E <b>A</b> L <b>S</b> QAQ <b>H</b> K <b>N</b> L <b>V</b> TL <b>K</b> GY <b>C</b> RY <b>G</b> D-DRLLI <b>S</b> Y <b>M</b> EN <b>G</b> SL <b>D</b> Y <b>W</b> L <b>H</b> ER <b>S</b> D                                      | 839 |
| <i>A. coerulea</i>       |       | 765 | STNNFDQ <b>A</b> NIIGCGGF <b>L</b> VYKA <b>N</b> LP <b>N</b> GS <b>K</b> AA <b>I</b> KR <b>L</b> SG <b>D</b> CG--Q <b>M</b> ER <b>E</b> F <b>R</b> AE <b>V</b> E <b>A</b> L <b>S</b> RAQH <b>K</b> N <b>L</b> V <b>P</b> L <b>Q</b> GY <b>C</b> R <b>H</b> GN-DRLLI <b>S</b> Y <b>M</b> EN <b>G</b> SL <b>D</b> Y <b>W</b> L <b>H</b> ER <b>V</b> D                                      | 859 |
| <i>M. guttatus</i>       |       | 748 | STNNF <b>S</b> Q <b>S</b> NI <b>V</b> CGCG <b>F</b> LVY <b>R</b> AD <b>F</b> PN <b>G</b> AA <b>V</b> KR <b>L</b> SG <b>D</b> CG--Q <b>M</b> ER <b>E</b> F <b>R</b> AE <b>V</b> E <b>A</b> L <b>S</b> RAQH <b>K</b> N <b>L</b> V <b>S</b> L <b>Q</b> GY <b>C</b> I <b>Y</b> R <b>N</b> -DRLLI <b>S</b> Y <b>M</b> EN <b>G</b> SL <b>D</b> Y <b>W</b> L <b>H</b> E <b>Q</b> I <b>E</b>     | 842 |
| <i>S. lycopersicum</i>   |       | 736 | STNNF <b>N</b> Q <b>S</b> NI <b>V</b> CGCG <b>F</b> LVY <b>K</b> AE <b>L</b> PN <b>G</b> IK <b>T</b> AI <b>K</b> R <b>L</b> SG <b>D</b> CG--Q <b>M</b> ER <b>E</b> F <b>R</b> AE <b>V</b> E <b>A</b> L <b>S</b> RAQH <b>K</b> N <b>L</b> V <b>S</b> L <b>Q</b> GY <b>C</b> Q <b>H</b> G <b>S</b> -DRLLI <b>S</b> Y <b>M</b> EN <b>G</b> SL <b>D</b> Y <b>W</b> L <b>H</b> ER <b>V</b> D  | 830 |
| <i>S. tuberosum</i>      |       | 763 | STNNF <b>N</b> Q <b>S</b> NI <b>V</b> CGCG <b>F</b> LVY <b>K</b> AE <b>L</b> PN <b>G</b> IK <b>T</b> AI <b>K</b> R <b>L</b> SG <b>D</b> CG--Q <b>M</b> ER <b>E</b> F <b>R</b> AE <b>V</b> E <b>A</b> L <b>S</b> RAQH <b>K</b> N <b>L</b> V <b>S</b> L <b>Q</b> GY <b>C</b> Q <b>H</b> G <b>S</b> -DRLLI <b>S</b> Y <b>M</b> EN <b>G</b> SL <b>D</b> Y <b>W</b> L <b>H</b> ER <b>V</b> D  | 857 |
| <i>V. vinifera</i>       |       | 513 | STNNF <b>N</b> Q <b>A</b> NIIGCGGF <b>L</b> VYKA <b>N</b> LPD <b>G</b> T <b>R</b> AA <b>I</b> KR <b>L</b> SG <b>D</b> CG--Q <b>M</b> ER <b>E</b> F <b>R</b> AE <b>V</b> E <b>A</b> L <b>S</b> RAQH <b>K</b> N <b>L</b> V <b>S</b> L <b>Q</b> GY <b>C</b> R <b>H</b> GN-DRLLI <b>S</b> Y <b>M</b> EN <b>G</b> SL <b>D</b> Y <b>W</b> L <b>H</b> ER <b>V</b> D                             | 607 |
| <i>E. grandis</i>        |       | 766 | STSNF <b>S</b> Q <b>A</b> NIIGCGGF <b>L</b> VYKA <b>L</b> LPD <b>G</b> T <b>K</b> AA <b>V</b> KR <b>L</b> SG <b>D</b> CG--Q <b>V</b> ER <b>E</b> F <b>H</b> AE <b>V</b> E <b>A</b> L <b>S</b> RAQH <b>K</b> N <b>L</b> V <b>S</b> L <b>Q</b> GY <b>C</b> R <b>H</b> GN-DRLLI <b>S</b> Y <b>M</b> EN <b>G</b> SL <b>D</b> Y <b>W</b> L <b>H</b> EC <b>N</b> D                             | 860 |
| <i>P. trichocarpa</i>    |       | 766 | STNNF <b>N</b> Q <b>A</b> NIIGCGGF <b>L</b> VYKA <b>N</b> FP <b>N</b> D <b>T</b> KAA <b>I</b> KR <b>L</b> SG <b>D</b> CG--Q <b>M</b> ER <b>E</b> F <b>R</b> AE <b>V</b> E <b>A</b> L <b>S</b> RAQH <b>K</b> N <b>L</b> V <b>S</b> L <b>Q</b> GY <b>C</b> R <b>H</b> GN-YRLLI <b>S</b> Y <b>M</b> EN <b>G</b> SL <b>D</b> Y <b>W</b> L <b>H</b> ES <b>V</b> D                             | 860 |
| <i>L. usitatissimum</i>  |       | 767 | ATNNF <b>S</b> Q <b>A</b> NIIGCGGF <b>L</b> VYKA <b>N</b> LP <b>N</b> G <b>K</b> AA <b>I</b> KK <b>L</b> SG <b>D</b> CG--Q <b>I</b> ER <b>E</b> F <b>R</b> AE <b>V</b> E <b>A</b> L <b>S</b> RAQH <b>K</b> N <b>L</b> V <b>S</b> L <b>Q</b> GY <b>C</b> K <b>H</b> G <b>S</b> -DRLLV <b>S</b> Y <b>M</b> EN <b>G</b> SL <b>D</b> Y <b>W</b> L <b>H</b> EC <b>V</b> D                     | 861 |
| <i>M. esculenta</i>      |       | 767 | STNNF <b>N</b> Q <b>A</b> NIIGCGGF <b>L</b> VYKA <b>N</b> LP <b>N</b> G <b>T</b> KAA <b>I</b> KR <b>L</b> SG <b>D</b> CG--Q <b>M</b> ER <b>E</b> F <b>R</b> AE <b>V</b> E <b>A</b> L <b>S</b> RAQH <b>K</b> N <b>L</b> V <b>S</b> L <b>Q</b> GY <b>C</b> R <b>H</b> GN-DRLLI <b>S</b> Y <b>M</b> EN <b>G</b> SL <b>D</b> Y <b>W</b> L <b>H</b> EC <b>V</b> D                             | 861 |
| <i>R. communis</i>       |       | 766 | ATNNF <b>N</b> Q <b>A</b> NIIGCGGF <b>L</b> VYKA <b>L</b> LP <b>N</b> GAKAA <b>I</b> KR <b>L</b> SG <b>D</b> CG--Q <b>M</b> ER <b>E</b> F <b>R</b> AE <b>V</b> E <b>A</b> L <b>S</b> RAQH <b>K</b> N <b>L</b> V <b>S</b> L <b>Q</b> GY <b>C</b> R <b>H</b> GN-DRLLI <b>S</b> Y <b>M</b> EN <b>G</b> SL <b>D</b> Y <b>W</b> L <b>H</b> EC <b>A</b> D                                      | 860 |
| <i>C. papaya</i>         |       | 631 | STNNFDQ <b>A</b> NIIGCGGF <b>L</b> VYKA <b>L</b> LPD <b>S</b> R <b>K</b> V <b>A</b> IKR <b>L</b> SG <b>D</b> CG--Q <b>M</b> D <b>R</b> E <b>F</b> R <b>A</b> E <b>V</b> E <b>A</b> L <b>S</b> RAQH <b>P</b> N <b>L</b> V <b>L</b> L <b>Q</b> GY <b>C</b> M <b>H</b> K <b>N</b> -DRLLI <b>S</b> Y <b>M</b> EN <b>G</b> SL <b>D</b> Y <b>W</b> L <b>H</b> E <b>K</b> I <b>D</b>            | 725 |
| <i>G. raimondii</i>      |       | 767 | STNNF <b>N</b> Q <b>A</b> NIIGCGGF <b>L</b> VYKA <b>L</b> LPD <b>G</b> T <b>N</b> AA <b>V</b> KR <b>L</b> SG <b>D</b> CG--Q <b>M</b> ER <b>E</b> F <b>R</b> AE <b>V</b> E <b>A</b> L <b>S</b> RAQH <b>K</b> N <b>L</b> V <b>S</b> L <b>Q</b> GY <b>C</b> K <b>H</b> GN-DRLLI <b>S</b> Y <b>M</b> EN <b>G</b> SL <b>D</b> Y <b>W</b> L <b>H</b> ES <b>V</b> D                             | 861 |
| <i>T. cacao</i>          |       | 767 | STNNF <b>N</b> Q <b>A</b> NIIGCGGF <b>L</b> VYKA <b>L</b> LPD <b>G</b> T <b>K</b> AA <b>V</b> KR <b>L</b> SG <b>D</b> CG--Q <b>M</b> ER <b>E</b> F <b>R</b> AE <b>V</b> E <b>A</b> L <b>S</b> RAQH <b>K</b> N <b>L</b> V <b>S</b> L <b>Q</b> GY <b>C</b> K <b>H</b> GN-DRLLI <b>S</b> Y <b>M</b> EN <b>G</b> SL <b>D</b> Y <b>W</b> L <b>H</b> ES <b>V</b> D                             | 861 |
| <i>A. lyrata</i>         |       | 750 | STNNF <b>S</b> Q <b>A</b> NIIGCGGF <b>L</b> VYKA <b>N</b> FP <b>D</b> GS <b>K</b> AA <b>V</b> KR <b>L</b> SG <b>D</b> CG--Q <b>M</b> ER <b>E</b> F <b>R</b> AE <b>V</b> E <b>A</b> L <b>S</b> RAEH <b>K</b> N <b>L</b> V <b>S</b> L <b>Q</b> GY <b>C</b> K <b>H</b> GN-DRLLI <b>S</b> Y <b>F</b> M <b>E</b> NG <b>S</b> L <b>D</b> Y <b>W</b> L <b>H</b> ER <b>V</b> D                   | 844 |
| <i>A. thaliana</i>       |       | 750 | STNNF <b>S</b> Q <b>A</b> NIIGCGGF <b>L</b> VYKA <b>N</b> FP <b>D</b> G <b>T</b> KAA <b>V</b> KR <b>L</b> SG <b>D</b> CG--Q <b>V</b> ER <b>E</b> F <b>H</b> AE <b>V</b> E <b>A</b> L <b>S</b> RAEH <b>K</b> N <b>L</b> V <b>S</b> L <b>Q</b> GY <b>C</b> R <b>H</b> GN-DRLLI <b>S</b> Y <b>M</b> EN <b>G</b> SL <b>D</b> Y <b>W</b> L <b>H</b> ER <b>V</b> D                             | 844 |
| <i>B. stricta</i>        |       | 750 | STNNF <b>S</b> Q <b>A</b> NIIGCGGF <b>L</b> VYKA <b>N</b> FP <b>D</b> GS <b>K</b> AA <b>V</b> KR <b>L</b> SG <b>D</b> CG--Q <b>M</b> ER <b>E</b> F <b>R</b> AE <b>V</b> E <b>A</b> L <b>S</b> RAEH <b>K</b> N <b>L</b> V <b>S</b> L <b>Q</b> GY <b>C</b> K <b>H</b> GN-DRLLI <b>S</b> Y <b>F</b> M <b>E</b> NG <b>S</b> L <b>D</b> Y <b>W</b> L <b>H</b> ER <b>V</b> D                   | 844 |
| <i>B. rapa</i>           |       | 719 | STNGF <b>S</b> Q <b>A</b> NIIGCGGF <b>L</b> VYKA <b>N</b> LP <b>D</b> GS <b>K</b> AA <b>V</b> K <b>L</b> SG <b>D</b> CG--Q <b>M</b> ER <b>E</b> F <b>R</b> AE <b>V</b> E <b>A</b> L <b>S</b> RAEH <b>N</b> L <b>V</b> S <b>L</b> Q <b>Y</b> C <b>K</b> H <b>G</b> D-DRLLI <b>S</b> Y <b>F</b> M <b>E</b> NG <b>S</b> L <b>D</b> Y <b>W</b> L <b>H</b> ER <b>V</b> D                      | 813 |
| <i>C. grandiflora</i>    |       | 750 | STNNF <b>S</b> Q <b>A</b> NIIGCGGF <b>L</b> VYKA <b>N</b> FP <b>D</b> GS <b>K</b> AA <b>V</b> KR <b>L</b> SG <b>D</b> CG--Q <b>M</b> ER <b>E</b> F <b>R</b> AE <b>V</b> E <b>A</b> L <b>S</b> RAEH <b>K</b> N <b>L</b> V <b>S</b> L <b>Q</b> GY <b>C</b> R <b>H</b> GN-DRLLI <b>S</b> Y <b>F</b> M <b>E</b> NG <b>S</b> L <b>D</b> Y <b>W</b> L <b>H</b> ER <b>V</b> D                   | 844 |
| <i>C. rubella</i>        |       | 750 | STNNF <b>S</b> Q <b>A</b> NIIGCGGF <b>L</b> VYKA <b>N</b> FP <b>D</b> GS <b>K</b> AA <b>V</b> KR <b>L</b> SG <b>D</b> CG--Q <b>M</b> ER <b>E</b> F <b>R</b> AE <b>V</b> E <b>A</b> L <b>S</b> RAEH <b>K</b> N <b>L</b> V <b>S</b> L <b>Q</b> GY <b>C</b> K <b>H</b> GN-DRLLI <b>S</b> Y <b>F</b> M <b>E</b> NG <b>S</b> L <b>D</b> Y <b>W</b> L <b>H</b> ER <b>V</b> D                   | 844 |
| <i>E. salugineum</i>     |       | 731 | STN <b>F</b> SQ <b>A</b> NIIGCGGF <b>L</b> VYKA <b>N</b> LP <b>D</b> GS <b>K</b> AA <b>V</b> KR <b>L</b> SG <b>D</b> CG--Q <b>M</b> ER <b>E</b> F <b>R</b> AE <b>V</b> E <b>A</b> L <b>S</b> RAEH <b>K</b> N <b>L</b> V <b>S</b> L <b>Q</b> GY <b>C</b> K <b>H</b> GN-DRLLI <b>S</b> Y <b>F</b> M <b>E</b> NG <b>S</b> L <b>D</b> Y <b>W</b> L <b>H</b> ER <b>V</b> D                    | 825 |
| <i>C. sinensis</i>       |       | 765 | STNNF <b>N</b> Q <b>A</b> NIIGCGGF <b>L</b> VYKA <b>L</b> LT <b>N</b> G <b>T</b> KAA <b>V</b> KR <b>L</b> SG <b>D</b> CG--Q <b>M</b> ER <b>E</b> F <b>R</b> AE <b>V</b> E <b>A</b> L <b>S</b> RAQH <b>K</b> N <b>L</b> V <b>S</b> L <b>Q</b> GY <b>C</b> R <b>H</b> GN-DRLLI <b>S</b> Y <b>M</b> EN <b>G</b> SL <b>D</b> Y <b>W</b> L <b>H</b> ES <b>V</b> D                             | 859 |
| <i>C. clementina</i>     |       | 769 | STNNF <b>N</b> Q <b>A</b> NIIGCGGF <b>L</b> VYKA <b>L</b> LT <b>N</b> G <b>T</b> KAA <b>V</b> KR <b>L</b> SG <b>D</b> CG--Q <b>M</b> ER <b>E</b> F <b>R</b> AE <b>V</b> E <b>A</b> L <b>S</b> RAQH <b>K</b> N <b>L</b> V <b>S</b> L <b>Q</b> GY <b>C</b> R <b>H</b> GN-DRLLI <b>S</b> Y <b>M</b> EN <b>G</b> SL <b>D</b> Y <b>W</b> L <b>H</b> ES <b>V</b> D                             | 863 |
| <i>C. sativus</i>        |       | 776 | ATCN <b>F</b> NQ <b>A</b> NIIGCGGF <b>L</b> VYKA <b>L</b> SL <b>P</b> NG <b>K</b> AA <b>V</b> KR <b>L</b> T <b>G</b> D <b>C</b> G--Q <b>M</b> ER <b>E</b> F <b>R</b> AE <b>V</b> E <b>A</b> L <b>S</b> RAQH <b>K</b> N <b>L</b> V <b>S</b> L <b>Q</b> GY <b>C</b> K <b>H</b> GN-DRLLI <b>S</b> Y <b>M</b> EN <b>G</b> SL <b>D</b> Y <b>W</b> L <b>H</b> EV <b>D</b>                      | 870 |
| <i>G. max</i>            |       | 773 | STNNF <b>N</b> Q <b>A</b> NIIGCGGF <b>L</b> VYKA <b>L</b> LP <b>N</b> GAKAA <b>V</b> KR <b>L</b> SG <b>D</b> CG--Q <b>M</b> ER <b>E</b> F <b>R</b> AE <b>V</b> E <b>A</b> L <b>S</b> RAQH <b>K</b> N <b>L</b> V <b>S</b> L <b>Q</b> GY <b>C</b> R <b>H</b> GN-DRLLI <b>S</b> Y <b>S</b> Y <b>L</b> E <b>N</b> G <b>S</b> L <b>D</b> Y <b>W</b> L <b>H</b> EC <b>V</b> D                  | 867 |
| <i>M. domestica</i>      |       | 768 | ATSN <b>F</b> NQ <b>A</b> NIIGCGGF <b>L</b> VYKA <b>N</b> LP <b>N</b> GAKAA <b>V</b> KR <b>L</b> SG <b>D</b> CG--Q <b>M</b> ER <b>E</b> F <b>R</b> AE <b>V</b> E <b>A</b> L <b>S</b> RAQH <b>K</b> N <b>L</b> V <b>S</b> L <b>Q</b> GY <b>C</b> R <b>H</b> GN-DRLLI <b>S</b> Y <b>M</b> EN <b>G</b> SL <b>D</b> Y <b>W</b> L <b>H</b> ES <b>V</b> D                                      | 862 |
| <i>M. truncatula</i>     |       | 770 | STSN <b>F</b> NQ <b>A</b> NIIGCGGF <b>L</b> VYKA <b>L</b> LP <b>N</b> G <b>M</b> KAA <b>V</b> KR <b>L</b> SG <b>D</b> CG--Q <b>M</b> ER <b>E</b> F <b>R</b> AE <b>V</b> E <b>A</b> L <b>S</b> RAQH <b>K</b> N <b>L</b> V <b>S</b> L <b>Q</b> GY <b>C</b> R <b>H</b> GN-DRLLI <b>S</b> Y <b>M</b> EN <b>G</b> SL <b>D</b> Y <b>W</b> L <b>H</b> EC <b>V</b> D                             | 864 |
| <i>P. vulgaris</i>       |       | 769 | STNNF <b>N</b> Q <b>A</b> NIIGCGGF <b>L</b> VYKA <b>L</b> LP <b>N</b> G <b>T</b> KAA <b>I</b> KR <b>L</b> SG <b>D</b> CG--Q <b>M</b> ER <b>E</b> F <b>R</b> AE <b>V</b> E <b>A</b> L <b>S</b> RAQH <b>K</b> N <b>L</b> V <b>S</b> L <b>Q</b> GY <b>C</b> R <b>H</b> GN-DRLLI <b>S</b> Y <b>S</b> Y <b>L</b> E <b>N</b> G <b>S</b> L <b>D</b> Y <b>W</b> L <b>H</b> EC <b>V</b> D         | 863 |
| <i>P. persica</i>        |       | 767 | STNNF <b>N</b> Q <b>A</b> NIIGCGGF <b>L</b> VYKA <b>N</b> LP <b>N</b> G <b>T</b> KAA <b>I</b> KR <b>L</b> SG <b>E</b> CG--Q <b>M</b> ER <b>E</b> F <b>R</b> AE <b>V</b> E <b>A</b> L <b>S</b> RAQH <b>K</b> N <b>L</b> V <b>S</b> L <b>Q</b> GY <b>C</b> R <b>H</b> GN-DRLLI <b>S</b> Y <b>M</b> EN <b>G</b> SL <b>D</b> Y <b>W</b> L <b>H</b> ES <b>V</b> D                             | 861 |

|                          |       | CaM binding site |                                         |            |          | Activation segment |         |         |          |          |            |            |     |
|--------------------------|-------|------------------|-----------------------------------------|------------|----------|--------------------|---------|---------|----------|----------|------------|------------|-----|
| <i>A. thaliana</i>       | PSKR1 | 825              | GPALLKWKTRLRIAQGAAGLLYLHGECDPHILHRDIKS  | SNILLDENFN | NSHLADFL | GLARLMS            | SPYETHV | TSVSTDL | VLVGTLYG | IPPEYQGA | SVATYKGDVY | 920        |     |
| <i>P. patens</i>         |       | 965              | ALEHLDPKFRFRIALGSARGLCFLHHGFIPHIHRDIKA  | SNILLDANF  | EPRVADF  | GLARLIS            | AYDSHVS | TDIAGT  | FGYIPPEY | QGSWR    | STTRGDVY   | 1060       |     |
| <i>S. moellendorffii</i> |       | 867              | S. moellendorffii                       | SNILLDGD   | LRAHVAD  | FLARLML            | PSDTHVT | DELVGT  | LYGIPPEY | QAQS     | SEASLRGDVY | 962        |     |
| <i>A. trichopoda</i>     |       | 854              | EGLMLDWGTRLKIAQGSARGLAYLHRVCDPNIHRDVKS  | SNILLNDK   | FEAHLAD  | FGLSRL             | LRPYD   | THVT    | DLVGT    | LYGIPPEY | QGLTAT     | PKGDVY     | 949 |
| <i>B. distachyon</i>     |       | 832              | GGYMLKWD SRLKIAQGSARGLAYLHKVCEPNIHRDVKS | SNILLNEN   | FEAHLAD  | FGLARLM            | QPYD    | THVT    | DELVGT   | LYGIPPEY | SQSLIAT    | PKGDVY     | 927 |
| <i>O. sativa</i>         |       | 852              | GGYMLKWSERLRIAQGSARGLAYLHKVCEPNIHRDVKS  | SNILLNEN   | FEAHLAD  | FGLARLI            | QPYD    | THVT    | DLVGT    | LYGIPPEY | SQSVIAT    | PKGDVY     | 947 |
| <i>P. virgatum</i>       |       | 729              | GGYMLKWSERLRIAQGSARGLAYLHKVCEPNIHRDVKS  | SNILLNEN   | FEAHLAD  | FGLARLI            | QPYD    | THVT    | DLVGT    | LYGIPPEY | SQSVIAT    | PKGDVY     | 824 |
| <i>S. italica</i>        |       | 838              | GGYMLKWSERLRIAQGSARGLAYLHKVCEPNIHRDVKS  | SNILLNEN   | FEAHLAD  | FGLARLI            | QPYD    | THVT    | DLVGT    | LYGIPPEY | SQSVIAT    | PKGDVY     | 933 |
| <i>S. bicolor</i>        |       | 846              | GGYMLKWSERLRIAQGSARGLAYLHKVCEPNIHRDVKS  | SNILLNEN   | FEAHLAD  | FGLARLI            | QPYD    | THVT    | DLVGT    | LYGIPPEY | SQAVIAT    | PKGDVY     | 941 |
| <i>Z. mays</i>           |       | 840              | GGYVLTWESERLRIAQGSARGLAYLHKVCEPNIHRDVKS | SNILLNEN   | FEAHLAD  | FGLARLI            | QPYD    | THVT    | DLVGT    | LYGIPPEY | SQAVIAT    | PKGDVY     | 935 |
| <i>A. coerulea</i>       |       | 860              | GGYMLKWDVRLKIAQGAAGGLAYLHKVCEPNIHRDVKS  | SNILLNEN   | FEAHLAD  | FGLARLI            | QPYD    | THVT    | DLVGT    | LYGIPPEY | SQAVIAT    | PKGDVY     | 955 |
| <i>M. guttatus</i>       |       | 843              | DGSFLDWEKRLKIAQGAARGLAYLHN--EPNIHRDIKT  | SNILLNEN   | FEAHLAD  | FGLSRL             | LHPYD   | THVT    | DLVGT    | LYGIPPEY | SQSLAAT    | FRGDVY     | 936 |
| <i>S. lycopersicum</i>   |       | 831              | -GSSLTWDMRLKIAQGAARGLAYLHK--EPNIHRDIKT  | SNILLNEN   | FEAHLAD  | FGLSRL             | LRPYD   | THVT    | DLVGT    | LYGIPPEY | SQTLTAT    | FRGDVY     | 923 |
| <i>S. tuberosum</i>      |       | 858              | -GSSLTWDIRLKIAQGAAGGLAYLHK--EPNIHRDIKT  | SNILLNEN   | FEAHLAD  | FGLSRL             | LHPYD   | THVT    | DLVGT    | LYGIPPEY | SQTLTAT    | FRGDVY     | 950 |
| <i>V. vinifera</i>       |       | 608              | GSSILKWDVRLKIAQGAARGLAYLHKVCEPNIHRDVKS  | SNILLNEN   | FEAHLAD  | FGLSRL             | LRPYD   | THVT    | DLVGT    | LYGIPPEY | SQTLTAT    | FRGDVY     | 703 |
| <i>E. grandis</i>        |       | 861              | GGSVLAWDVRKIAQGAARGLAYLHKVCEPNIHRDVKS   | SNILLDEK   | FEAHLAD  | FGLSRL             | LRPYD   | THVT    | DLVGT    | LYGIPPEY | SQTLTAT    | FRGDVY     | 956 |
| <i>P. trichocarpa</i>    |       | 861              | GTSVLKWEVRLKIAQGAARGLAYLHKVCEPNIHRDVKS  | SNILLDEN   | FEAHLAD  | FGLSRL             | LRPYD   | THVT    | DLVGT    | LYGIPPEY | SQTLMAT    | CRGDVY     | 956 |
| <i>L. usitatissimum</i>  |       | 862              | GPSVLQWEARLKIAGKAAGGLAYLHKICEPNIHRDVKS  | SNILLDEK   | FEAHLAD  | FGLSRL             | LRPYD   | THVT    | DLVGT    | LYGIPPEY | SQALTAT    | CRGDVY     | 957 |
| <i>M. esculenta</i>      |       | 862              | GASFLKWDVRLKVAQGAASGLAYLHKVCEPNIHRDVKS  | SNILLDEK   | FEAHLAD  | FGLSRL             | LRPYD   | THVT    | DLVGT    | LYGIPPEY | SQTLTAT    | CRGDVY     | 957 |
| <i>R. communis</i>       |       | 861              | GASFLKWEVRLKIAQGAASGLAYLHKVCEPNIHRDVKS  | SNILLDEK   | FEAHLAD  | FGLSRL             | LRPYD   | THVT    | DLVGT    | LYGIPPEY | SQTLTAT    | CRGDVY     | 918 |
| <i>C. papaya</i>         |       | 726              | GLSSLDWNTRIQAIGAARGLAYLHQCEPHILHRDIKS   | SNILLDEN   | FEAHLAD  | FGLARLI            | LPYD    | THVT    | DLVGT    | LYGIPPEY | QGA        | SVATYKGDVY | 821 |
| <i>G. raimondii</i>      |       | 862              | GSSVLKWDVRLKIAQGAARGLAYLHKVCEPNIHRDVKS  | SNILLDEK   | FEAHLAD  | FGLSRL             | LRPYD   | THVT    | DLVGT    | LYGIPPEY | SQTLTAT    | CRGDVY     | 957 |
| <i>T. cacao</i>          |       | 862              | GSSILKWDVRLKIAQGAARGLAYLHKVCEPNIHRDVKS  | SNILLDEK   | FEAHLAD  | FGLSRL             | LRPYD   | THVT    | DLVGT    | LYGIPPEY | SQTLTAT    | CRGDVY     | 957 |
| <i>A. lyrata</i>         |       | 845              | GNMTLKWVRLKIAQGAARGLAYLHKVCEPNIHRDVKS   | SNILLDEK   | FEAHLAD  | FGLARL             | LRPYD   | THVT    | DLVGT    | LYGIPPEY | SQSLIAT    | CRGDVY     | 940 |
| <i>A. thaliana</i>       |       | 845              | GNMTLIWDVRLKIAQGAARGLAYLHKVCEPNIHRDVKS  | SNILLDEK   | FEAHLAD  | FGLARL             | LRPYD   | THVT    | DLVGT    | LYGIPPEY | SQSLIAT    | CRGDVY     | 940 |
| <i>B. stricta</i>        |       | 845              | GNMTLKWVRLKIAQGAARGLAYLHKVCEPNIHRDVKS   | SNILLDEK   | FEAHLAD  | FGLARL             | LRPYD   | THVT    | DLVGT    | LYGIPPEY | SQSLIAT    | CRGDVY     | 940 |
| <i>B. rapa</i>           |       | 814              | GSTTLRWDVRLKIAQGAARGLAYLHKVCEPNIHRDVKS  | SNILLDEK   | FEAHLAD  | FGLARL             | LRPYD   | THVT    | DLVGT    | LYGIPPEY | SQALTAT    | CRGDVY     | 909 |
| <i>C. grandiflora</i>    |       | 845              | GNMTLKWVRLKIAQGAARGLAYLHKVCEPNIHRDVKS   | SNILLDEK   | FEAHLAD  | FGLARL             | LRPYD   | THVT    | DLVGT    | LYGIPPEY | SQSLIAT    | CRGDVY     | 940 |
| <i>C. rubella</i>        |       | 845              | GNMTLKWVRLKIAQGAARGLAYLHKVCEPNIHRDVKS   | SNILLDEK   | FEAHLAD  | FGLARL             | LRPYD   | THVT    | DLVGT    | LYGIPPEY | SQSLIAT    | CRGDVY     | 940 |
| <i>E. salsugineum</i>    |       | 826              | GNMTLKWVRLKIAQGAARGLAYLHKVCEPNIHRDVKS   | SNILLDEK   | FEAHLAD  | FGLARL             | LRPYD   | THVT    | DLVGT    | LYGIPPEY | SQSLIAT    | CRGDVY     | 921 |
| <i>C. sinensis</i>       |       | 860              | KDSVLKWDVRLKIAQGAARGLAYLHKVCEPNIHRDVKS  | SNILLDEK   | FEAHLAD  | FGLSRL             | LRPYD   | THVT    | DLVGT    | LYGIPPEY | SQTLTAT    | CRGDVY     | 955 |
| <i>C. clementina</i>     |       | 864              | KDSVLKWDVRLKIAQGAARGLAYLHKVCEPNIHRDVKS  | SNILLDEK   | FEAHLAD  | FGLSRL             | LRPYD   | THVT    | DLVGT    | LYGIPPEY | SQTLTAT    | CRGDVY     | 959 |
| <i>C. sativus</i>        |       | 871              | NDSILKWETRLKIAQGAARGLAYLHKCEPNIHRDVKS   | SNILLDDR   | FEAHLAD  | FGLSRL             | LRPYD   | THVT    | DLVGT    | LYGIPPEY | SQTLTAT    | CRGDVY     | 966 |
| <i>G. max</i>            |       | 868              | ENSALKWDSRLKVAQGAARGLAYLHKCEPNIHRDVKS   | SNILLDDN   | FEAHLAD  | FGLSRL             | LQPYD   | THVT    | DLVGT    | LYGIPPEY | SQTLTAT    | FRGDVY     | 963 |
| <i>M. domestica</i>      |       | 863              | SFSLKWDVRLKIAQGAARGLAYLHKVCEPNIHRDIKT   | SNILLDEK   | FEAHLAD  | FGLSRL             | LRPYD   | THVT    | DLVGT    | LYGIPPEY | SQTLTAT    | CRGDVY     | 958 |
| <i>M. truncatula</i>     |       | 865              | GNALKWVRLKIAQGAARGLAYLHKCEPNIHRDIKS     | SNILLNDK   | FEAHLAD  | FGLSRL             | SPYD    | THVT    | DLVGT    | LYGIPPEY | SQTLTAT    | FRGDVY     | 960 |
| <i>P. vulgaris</i>       |       | 864              | ESALKWDARLKIAQGAARGLAYLHKCEPNIHRDVKS    | SNILLDDK   | FEAHLAD  | FGLSRL             | LQPYD   | THVT    | DLVGT    | LYGIPPEY | SQTLTAT    | FRGDVY     | 959 |
| <i>P. persica</i>        |       | 862              | GVSLKWDVRLKIAQGAARGLAYLHKCEPNIHRDIKT    | SNILLDEK   | FEAHLAD  | FGLSRL             | LRPYD   | THVT    | DLVGT    | LYGIPPEY | SQTLTAT    | CRGDVY     | 957 |

|                          |       | GC centre |                                          |           |            |          |          |          |           |            |              |                |                |               |      |
|--------------------------|-------|-----------|------------------------------------------|-----------|------------|----------|----------|----------|-----------|------------|--------------|----------------|----------------|---------------|------|
| <i>A. thaliana</i>       | PSKR1 | 921       | SFGVLLLELLTGRKP-VDMCKPKGCRDLISWVVKMKHES  | RASEVFDPL | -IYSKEND   | ---      | KEMFRVLE | IACLCL   | SENPKQRPT | QQLVSWLDDV | 1008         |                |                |               |      |
| <i>P. patens</i>         |       | 1061      | SYGVILLEMLTGKEPTRDDFKDIEGNNLVGWVRQVIRKGD | APKALDSE  | VSVKGPWN   | ---      | TMLKVLH  | IANLCTA  | EDP       | IRRP       | TMLQVVKFLKDI | 1149           |                |               |      |
| <i>S. moellendorffii</i> |       | 963       | SFGVLLVLELTSRRP-VDACRRGGIRDLPVWVEGMQATGR | GIEIVD    | PLLQNYSE   | VDAL     | EMLRVL   | DVACIC   | VDSC      | PQR        | RGIEVVAWLDV  | 1054           |                |               |      |
| <i>A. trichopoda</i>     |       | 950       | SFGVLLLELLTGRKP-VDVCKSGKCRDLVSWVQMKREK   | KEEIFVFP  | ---        | KQLLQVLE | IACK     | ICD      | PPRR      | RSIE       | QVSWLSDV     | 1037           |                |               |      |
| <i>B. distachyon</i>     |       | 928       | SFGVLLLELLTGRKP-VGVLIVK--WDLVSWTLQMQSEN  | KEEQIFDKL | -IWSKEHE   | ---      | KQLLAVLE | EAACR    | CINAD     | PRQRP      | PIEQVVAWLDGI | 1013           |                |               |      |
| <i>O. sativa</i>         |       | 948       | SFGVLLLELLTGRRP-MDVSKAKGSRDLVSVLQMKSEK   | KEEQIFD   | L-IWSKTHE  | ---      | KQLFSVLE | EAACR    | CISTD     | PRQRP      | SEIQVVAWLDV  | 1035           |                |               |      |
| <i>P. virgatum</i>       |       | 825       | SFGVLLLELLTGRKP-VDVSKSKGSRDLISWVQMKSEK   | KEEQIFD   | L-IWSKAHE  | ---      | KQLLSVLE | ITCK     | CISAD     | PRQRP      | SEIEVVSCLDKV | 912            |                |               |      |
| <i>S. italica</i>        |       | 934       | SFGVLLLELLTGRKP-VDVSKSKGSRDLISWVQMKSEK   | KEEQIFD   | L-IWSKAHE  | ---      | KQLLSVLE | ITCK     | CISAD     | PRQRP      | SEIEVVSCLDNV | 1021           |                |               |      |
| <i>S. bicolor</i>        |       | 942       | SFGVLLLELLTGRRP-VDVSKFKGSRDLISWVQMKSEK   | KEEQIFD   | L-IWSKTHE  | ---      | KQLLSVLE | TACK     | CISTD     | PRQRP      | SEIQVVSCLDNV | 1029           |                |               |      |
| <i>Z. mays</i>           |       | 936       | SFGVLLLELLTGRRP-VDVSRKSGSRDLISWVQMKSEK   | KEEQIFD   | L-IWSKAHE  | ---      | KQLLSVLE | TACK     | CISAD     | PRQRP      | SEIQVVSCLDNS | 1023           |                |               |      |
| <i>A. coerulea</i>       |       | 956       | SFGVLLLELLTSRRP-VDVCKAKGTRDLVSWVQLKLEN   | KEEQIFD   | PS-IWSKSLE | ---      | KQFIEVL  | GVACK    | IDQD      | PRRR       | RSIEQVVLSDSI | 1043           |                |               |      |
| <i>M. guttatus</i>       |       | 937       | SFGVLLLELLTGRRP-VEVCKGKNCRDLSVWVQMKSEK   | REMEIFD   | SSVVRD     | KECE     | ---      | KQAMEMLE | IACR      | CIERD      | PRRR         | RSIEQVVSLETTI  | 1025           |               |      |
| <i>S. lycopersicum</i>   |       | 924       | SFGVLLLELLTGRKP-VEVCRGKNCRDLSVWVQMKSEN   | RAEEIFD   | TT-IWDT    | SYE      | ---      | KQLEVL   | SIAC      | QCIVQD     | PRQRP        | SIQVVLWLEAI    | 1011           |               |      |
| <i>S. tuberosum</i>      |       | 951       | SFGVLLLELLTGRRP-VEVCRGKNCRDLSVWVQMKSEN   | VEEIFD    | TS-IWDT    | SYE      | ---      | RQLEVL   | SIAC      | QCIVQD     | PRQRP        | SIQVVLWLEAI    | 1038           |               |      |
| <i>V. vinifera</i>       |       | 704       | SFGVLLLELLTGRRP-VEVCKGKNCRDLSVWVQMKSEK   | KEEQIMD   | SS-VWDK    | DRE      | ---      | KQFLEV   | LGIAC     | ICDQD      | PRQRP        | SIQVVSWLDAV    | 791            |               |      |
| <i>E. grandis</i>        |       | 957       | SFGVLLLELLTSRRP-VEVCKGKNCRDLSVWVQMKSEK   | REEEIID   | PS-IWVK    | HE       | ---      | RQVLEV   | SVAC      | NC         | TD           | DRPRRR         | RSIEQVVSWLDRV  | 1044          |      |
| <i>P. trichocarpa</i>    |       | 957       | SFGVLLLELLTGRRP-VEVCKGKNCRDLSVWVQMKSEK   | REAEIID   | PA-IW      | KDHQ     | ---      | KQFEMLE  | IACR      | CLDQD      | PRRR         | PLIEEVVSWLVD   | 1044           |               |      |
| <i>L. usitatissimum</i>  |       | 958       | SFGVLLLELLTGRRP-VEVCKGKNCRDLSVWVQMKSEK   | REAEIID   | TS-IW      | KDRE     | ---      | KQLVEM   | LEIACR    | CLD        | HD           | PRRR           | PLIEEVVSWLSDGI | 1045          |      |
| <i>M. esculenta</i>      |       | 958       | SFGVLLLELLTGRRP-VEVCKGKNCRDLSVWVQMKSEK   | REAEIID   | TS-IW      | KDRE     | ---      | KQFEMLE  | IACR      | CLDQD      | PRRR         | PLIEEVVSWLSDGI | 1045           |               |      |
| <i>R. communis</i>       |       | 919       | SFGVLLLELLTGRRP-VEVCKGKNCRDLSVWVQMKSEK   | REAEIID   | TS-IW      | KDRE     | ---      | KQLEMLE  | IACR      | CLDQD      | PRRR         | PLIEEVVSWLSDGI | 1044           |               |      |
| <i>C. papaya</i>         |       | 822       | SFGVLLLELLTGRKP-MDMCKPKGSRDLISWVQMKSEN   | RENEV     | FD         | PF-IYDK  | QHD      | ---      | KEMCLV    | LQIAC      | ICLSE        | CPKVRPT        | QQLVSWLDNI     | 909           |      |
| <i>G. raimondii</i>      |       | 958       | SFGVLLLELLTGRRP-VEVCKGKNCRDLSVWVQMKSEK   | REAEIID   | TS-IW      | KDRE     | ---      | KQLLEMLE | IACR      | CLDQD      | PRRR         | PLIEEVVSWLNSI  | 1045           |               |      |
| <i>T. cacao</i>          |       | 958       | SFGVLLLELLTGRRP-VEVCKGKNCRDLSVWVQMKSEK   | REAEIID   | PS-IW      | KDRE     | ---      | KQLEMLE  | IACR      | CLDQD      | PRRR         | PLIEEVVSWLNGI  | 1045           |               |      |
| <i>A. lyrata</i>         |       | 941       | SFGVLLLELLTGRRP-VEVCKGKNCRDLSVWVQMKSEK   | REAEIID   | TT-I       | REN      | VNE      | ---      | KTVLEM    | LEIACR     | CI           | DHEPRRR        | PLIEEVVSWLEDL  | 1028          |      |
| <i>A. thaliana</i>       |       | 941       | SFGVLLLELLTGRRP-VEVCKGKNCRDLSVWVQMKSEK   | REAEIID   | TT-I       | REN      | VNE      | ---      | KTVLEM    | LEIACR     | CI           | DHEPRRR        | PLIEEVVSWLEDL  | 1028          |      |
| <i>B. stricta</i>        |       | 941       | SFGVLLLELLTGRRP-VEVCKGKNCRDLSVWVQMKSEK   | REAEIID   | TT-I       | REN      | VNE      | ---      | KTVLEM    | LEIACR     | CI           | DHEPRRR        | PLIEEVVSWLEDL  | 1028          |      |
| <i>B. rapa</i>           |       | 910       | SFGVLLLELLTGRRP-VEVCKGKNCRDLSVWVQMKSEK   | REAEIID   | AT-I       | MRE      | DVEE     | ---      | KEVLEM    | LEIACR     | CI           | DHEPRRR        | PLIEEVVSWLQDF  | 997           |      |
| <i>C. grandiflora</i>    |       | 941       | SFGVLLLELLTGRRP-VEVCKGKNCRDLSVWVQMKSEK   | REAEIID   | TT-I       | REN      | VNE      | ---      | KTVLEM    | LEIACR     | CI           | DHEPRRR        | PLIEEVVSWLEDL  | 1028          |      |
| <i>C. rubella</i>        |       | 941       | SFGVLLLELLTGRRP-VEVCKGKNCRDLSVWVQMKSEK   | REAEIID   | TT-I       | REN      | VNE      | ---      | KTVLEM    | LEIACR     | CI           | DHEPRRR        | PLIEEVVSWLEDL  | 1028          |      |
| <i>E. salsugineum</i>    |       | 922       | SFGVLLLELLTGRRP-VEVCKGKNCRDLSVWVQMKSEK   | REAEIID   | AT-I       | HDN      | LN       | ---      | KAVLEM    | LEIACR     | CI           | DHEPRRR        | PLIEEVVSWLEDF  | 1009          |      |
| <i>C. sinensis</i>       |       | 956       | SFGVLLLELLTGRRP-VEVCKGKNCRDLSVWVQMKSEK   | REVEIID   | AS-I       | WHK      | DRE      | ---      | KQLEMLE   | IACR       | ICDQD        | PRRR           | PLIEEVVSWLSDGI | 1043          |      |
| <i>C. clementina</i>     |       | 960       | SFGVLLLELLTGRRP-VEVCKGKNCRDLSVWVQMKSEK   | REVEIID   | AS-I       | WHK      | DRE      | ---      | KQLEMLE   | IACR       | ICDQD        | PRRR           | PLIEEVVSWLSDGI | 1047          |      |
| <i>C. sativus</i>        |       | 967       | SFGVLLLELLTGRRP-VEVCKGKNCRDLSVWVQMKSEK   | REVEIID   | PA-I       | WN       | TSK      | ---      | KQILEV    | LGIT       | CK           | IEQD           | PRRR           | PLIEEVVSWLDGV | 1054 |
| <i>G. max</i>            |       | 964       | SFGVLLLELLTGRRP-VEVCKGKNCRDLSVWVQMKSEN   | KEEQIFD   | VP-I       | WHK      | DHE      | ---      | KQLEVLA   | IACR       | CLN          | QD             | PRQRP          | SEIIVVSWLSDV  | 1051 |

|                      |     |                                                                                              |      |
|----------------------|-----|----------------------------------------------------------------------------------------------|------|
| <i>M. domestica</i>  | 959 | SFGVVLELLTGRRP-VEVCRGKNCRDLSWVWFQMRFEKRDEEIIDSS-IWNKNHE---KQLLDVLGVACKCLDPNPRQRPPIEEVVSCLDGI | 1046 |
| <i>M. truncatula</i> | 961 | SFGVVLELLTARRP-VEVIKGNCRNLVSVVYQMKYENKEQEIFDQT-IWEKERE---KQLEVLVSIACKCLDQDPRQRPSEIMVVSWLDSV  | 1048 |
| <i>P. vulgaris</i>   | 960 | SFGVVLELLTGRRP-VEVIKGNCRNLVFWVFMKSENKEQDIFDPA-IWHKDRE---KQLEMLAIACKCLDQDPRQRPPIEVVVSWLDCV    | 1047 |
| <i>P. persica</i>    | 958 | SFGVVLELLTGRRP-VEVCRGKNCRDLSWVWFQMKSEKREEEIIDSS-IWNKDHE---KQLEVLGVTKCLDPNPRQRPSEIEVVSCLDGI   | 1045 |

|                          |       |                             |      |
|--------------------------|-------|-----------------------------|------|
| <i>A. thaliana</i>       | PSKR1 | -----                       |      |
| <i>P. patens</i>         | 1150  | EDQDHV-----                 | 1155 |
| <i>S. moellendorffii</i> | 1055  | GSSRLKVGGLGKP-----          | 1066 |
| <i>A. trichopoda</i>     | 1038  | GDAEPVR-----                | 1044 |
| <i>B. distachyon</i>     | 1014  | SP-----                     | 1015 |
| <i>O. sativa</i>         |       | -----                       |      |
| <i>P. virgatum</i>       |       | -----                       |      |
| <i>S. italica</i>        |       | -----                       |      |
| <i>S. bicolor</i>        |       | -----                       |      |
| <i>Z. mays</i>           | 1024  | V-----                      |      |
| <i>A. coerulea</i>       | 1044  | PVDEA-----                  | 1048 |
| <i>M. guttatus</i>       | 1026  | EMEKA-----                  | 1030 |
| <i>S. lycopersicum</i>   | 1012  | ASVKER-----                 | 1017 |
| <i>S. tuberosum</i>      | 1039  | GSVKER-----                 | 1044 |
| <i>V. vinifera</i>       | 792   | GKEGVLPFLFAFEISSFSFFLS----- | 813  |
| <i>E. grandis</i>        | 1045  | GIEGSPGS-----               | 1052 |
| <i>P. trichocarpa</i>    | 1045  | SKVLNNEL-----               | 1052 |
| <i>L. usitatissimum</i>  | 1046  | GDT-----                    | 1048 |
| <i>M. esculenta</i>      | 1046  | GIQGA-----                  | 1050 |
| <i>R. communis</i>       | 1045  | GIQGAQ-----                 | 1050 |
| <i>C. papaya</i>         | 910   | ETTSSILIM-----              | 918  |
| <i>G. raimondii</i>      | 1046  | GNEVVRQ-----                | 1052 |
| <i>T. cacao</i>          | 1046  | EHEVVQQ-----                | 1052 |
| <i>A. lyrata</i>         | 1029  | PMESVQQQ-----               | 1036 |
| <i>A. thaliana</i>       | 1029  | PMESVQQQ-----               | 1036 |
| <i>B. stricta</i>        | 1029  | PMESVQ-----                 | 1034 |
| <i>B. rapa</i>           | 998   | PNQ-----                    | 1000 |
| <i>C. grandiflora</i>    | 1029  | PMESVQQQ-----               | 1036 |
| <i>C. rubella</i>        | 1029  | PMESVQQQ-----               | 1036 |
| <i>E. salsugineum</i>    | 1010  | PVESVQQQ-----               | 1017 |
| <i>C. sinensis</i>       | 1044  | GIDAA-----                  | 1048 |
| <i>C. clementina</i>     | 1048  | GIDAA-----                  | 1052 |
| <i>C. sativus</i>        | 1055  | TSIHTQ-----                 | 1060 |
| <i>G. max</i>            | 1052  | RFDGSQQ-----                | 1058 |
| <i>M. domestica</i>      | 1047  | GFESGKQ-----                | 1053 |
| <i>M. truncatula</i>     | 1049  | KVDGFQQ-----                | 1055 |
| <i>P. vulgaris</i>       | 1048  | RFDGSQQ-----                | 1054 |
| <i>P. persica</i>        | 1046  | GFESGTQ-----                | 1052 |

**Supplemental Figure S5.** Alignment of PSKR2 orthologs from higher plants and mosses. The intracellular sequences from 37 LRR-RLKs with highest similarity to Arabidopsis PSKR2 were identified from the Phytozome database. The positions of the phosphorylation sites identified in *Arabidopsis thaliana* PSKR1 are indicated. Green denotes sites identified in PSKR1 *in planta* and magenta those identified *in vitro*. Indicated in blue is the T890 that is also transphosphorylated by *E. coli*. Squares indicate unambiguous residues whereas circles indicate phosphorylation sites whose position was not confirmed. Red indicates a conserved residue at the respective position in PSKR2 orthologs and yellow a functionally conserved S/T or Y residue in PSKR2 orthologs.

## Supplemental Table 1

**Supplemental Table 1.** Identification of a single phosphorylation at T890 of H<sub>6</sub>-PSKR1-K762E protein by LC-ESI MS.

### Peptide Properties

| Sequence           | Start | End | Phospho-Site Equalling | Search Engine Score [%] | phosphoRS Score [%] | Phospho-Site Position | MH+ [Da] | RT [min] | Precursor Area |
|--------------------|-------|-----|------------------------|-------------------------|---------------------|-----------------------|----------|----------|----------------|
| HVSTDLVGTL         | 891   | 900 | no                     | 100,0                   | 50                  | -                     | 1121,52  | 63,45    | 1,40E+006      |
| MSPYETHVST         | 885   | 894 | yes                    | 100,0                   | 95,9                | 890                   | 1231,47  | 42,65    | 2,19E+005      |
| MSPYETHVSTDLV      | 885   | 897 | yes                    | 100,0                   | 100                 | 890                   | 1574,64  | 56,63    | 1,55E+007      |
| MSPYETHVSTDLVGTL   | 885   | 900 | yes                    | 100,0                   | 99,4                | 890                   | 1845,80  | 67,08    | 3,97E+007      |
| MSPYETHVSTDLVGTL   | 885   | 900 | yes                    | 100,0                   | 87,9                | 890                   | 1829,80  | 69,51    | 2,21E+006      |
| RLMSPYETHVST       | 883   | 894 | yes                    | 100,0                   | 100                 | 890                   | 1516,65  | 45,45    | 3,41E+006      |
| RLMSPYETHVST       | 883   | 894 | yes                    | 100,0                   | 86,3                | 890                   | 1500,65  | 50,14    | 9,14E+005      |
| RLMSPYETHVSTDLV    | 883   | 897 | yes                    | 100,0                   | 85                  | 890                   | 1843,83  | 58,46    | 7,63E+006      |
| RLMSPYETHVSTDLV    | 883   | 897 | yes                    | 100,0                   | 99,9                | 890                   | 1827,84  | 63,04    | 1,28E+006      |
| RLMSPYETHVSTDLVGTL | 883   | 900 | yes                    | 95,7                    | 99,5                | 890                   | 2114,98  | 66,42    | 5,53E+006      |
| RLMSPYETHVSTDLVGTL | 883   | 900 | yes                    | 100,0                   | 100                 | 890                   | 2098,99  | 62,68    | 3,19E+007      |

## Supplemental Table 2

**Supplemental Table 2.** Verification of the extent of phosphorylation between H<sub>6</sub>-PSKR1-KD and H<sub>6</sub>-PSKR1-K762E. A semi-quantitative label-free (precursor area) and spectral counting approach (SPC) was performed.

| Peptide Properties |                    |       |     |                        |                         |                     |                       |          |          |                |                         |      |                         |
|--------------------|--------------------|-------|-----|------------------------|-------------------------|---------------------|-----------------------|----------|----------|----------------|-------------------------|------|-------------------------|
| Origin             | Sequence           | Start | End | Phospho-Site Equalling | Search Engine Score [%] | phosphoRS Score [%] | Phospho-Site Position | MH+ [Da] | RT [min] | Precursor Area | Ratio Sample vs Control | PSMs | Ratio Sample vs Control |
| Sample             | HVSTDLVGTL         | 891   | 900 | yes                    | 68,4                    | 59,9                | 894                   | 1.121,52 | 61,88    | 2,52E+007      | 94,8                    | 19   | 90,5                    |
| Control            | HVSTDLVGTL         | 891   | 900 | no                     | 100,0                   | 50                  | -                     | 1121,52  | 63,45    | 1,40E+006      | 5,2                     | 2    | 9,5                     |
| Sample             | MSPYETHVST         | 885   | 894 | yes                    | 100,0                   | 76,1                | 890                   | 1.231,47 | 40,89    | 1,74E+007      | 98,8                    | 25   | 96,2                    |
| Control            | MSPYETHVST         | 885   | 894 | yes                    | 100,0                   | 95,9                | 890                   | 1231,47  | 42,65    | 2,19E+005      | 1,2                     | 1    | 3,8                     |
| Sample             | MSPYETHVSTDLV      | 885   | 897 | yes                    | 88,6                    | 84,1                | 890                   | 1.574,64 | 55,56    | 2,16E+008      | 93,3                    | 44   | 84,6                    |
| Control            | MSPYETHVSTDLV      | 885   | 897 | yes                    | 100,0                   | 100                 | 890                   | 1574,64  | 56,63    | 1,55E+007      | 6,7                     | 8    | 15,4                    |
| Sample             | MSPYETHVSTDLVGTL   | 885   | 900 | yes                    | 96,5                    | 86,9                | 890                   | 1.845,80 | 67,1     | 2,64E+008      | 86,9                    | 115  | 87,1                    |
| Control            | MSPYETHVSTDLVGTL   | 885   | 900 | yes                    | 100,0                   | 99,4                | 890                   | 1845,80  | 67,08    | 3,97E+007      | 13,1                    | 17   | 12,9                    |
| Sample             | MSPYETHVSTDLVGTL   | 885   | 900 | yes                    | 100,0                   | 98,9                | 890                   | 1.829,80 | 66,17    | 2,01E+008      | 98,9                    | 34   | 87,2                    |
| Control            | MSPYETHVSTDLVGTL   | 885   | 900 | yes                    | 100,0                   | 87,9                | 890                   | 1829,80  | 69,51    | 2,21E+006      | 1,1                     | 5    | 12,8                    |
| Sample             | RLMSPYETHVST       | 883   | 894 | yes                    | 100,0                   | 92,7                | 890                   | 1.516,65 | 44,02    | 5,81E+007      | 94,5                    | 42   | 93,3                    |
| Control            | RLMSPYETHVST       | 883   | 894 | yes                    | 100,0                   | 100                 | 890                   | 1516,65  | 45,45    | 3,41E+006      | 5,5                     | 3    | 6,7                     |
| Sample             | RLMSPYETHVST       | 883   | 894 | yes                    | 100,0                   | 90                  | 890                   | 1.500,65 | 45,76    | 1,48E+007      | 94,2                    | 35   | 89,7                    |
| Control            | RLMSPYETHVST       | 883   | 894 | yes                    | 100,0                   | 86,3                | 890                   | 1500,65  | 50,14    | 9,14E+005      | 5,8                     | 4    | 10,3                    |
| Sample             | RLMSPYETHVSTDLV    | 883   | 897 | yes                    | 88,5                    | 82,1                | 890                   | 1.843,83 | 55,7     | 8,56E+007      | 91,8                    | 87   | 89,7                    |
| Control            | RLMSPYETHVSTDLV    | 883   | 897 | yes                    | 100,0                   | 85                  | 890                   | 1843,83  | 58,46    | 7,63E+006      | 8,2                     | 10   | 10,3                    |
| Sample             | RLMSPYETHVSTDLV    | 883   | 897 | yes                    | 97,1                    | 99                  | 890                   | 1.827,83 | 58,63    | 8,32E+007      | 98,5                    | 70   | 92,1                    |
| Control            | RLMSPYETHVSTDLV    | 883   | 897 | yes                    | 100,0                   | 99,9                | 890                   | 1827,84  | 63,04    | 1,28E+006      | 1,5                     | 6    | 7,9                     |
| Sample             | RLMSPYETHVSTDLVGTL | 883   | 900 | yes                    | 74,7                    | 83,3                | 890                   | 2.114,98 | 63,6     | 1,33E+008      | 96,0                    | 174  | 88,3                    |
| Control            | RLMSPYETHVSTDLVGTL | 883   | 900 | yes                    | 95,7                    | 99,5                | 890                   | 2114,98  | 66,42    | 5,53E+006      | 4,0                     | 23   | 11,7                    |
| Sample             | RLMSPYETHVSTDLVGTL | 883   | 900 | yes                    | 95,4                    | 94,5                | 890                   | 2.098,99 | 64,98    | 2,40E+008      | 88,3                    | 87   | 97,8                    |
| Control            | RLMSPYETHVSTDLVGTL | 883   | 900 | yes                    | 100,0                   | 100                 | 890                   | 2098,99  | 62,68    | 3,19E+007      | 11,7                    | 2    | 2,2                     |



## Supplemental Table 3

**Supplemental Table 3.** Identification of two to three *in planta* phosphorylation sites (S698, S696/S698 and S886 or S893) of immunoprecipitated PSKR1-GFP by LC-ESI MS.

**Peptide Properties**

| Sequence                          | Start | End | Phospho-Site Equalling | Search Engine Score [%] | phosphoRS Score [%] | Phospho-Site Position | MH+ [Da] | RT [min] | Precursor Area |
|-----------------------------------|-------|-----|------------------------|-------------------------|---------------------|-----------------------|----------|----------|----------------|
| RSGEVDPEIEESES MNRK               | 685   | 702 | yes                    | 100,0                   | 99,4                | 698                   | 2171,92  | 27,01    | 7,94E+006      |
| RSGEVDPEIEESES MNRK               | 685   | 702 | yes                    | 100,0                   | 97,7                | 698                   | 2187,92  | 23,57    | 7,71E+006      |
| SGEVDPEIEESES MNRK                | 686   | 702 | yes                    | 95,2                    | 89,8                | 698                   | 2015,82  | 30,13    | 1,55E+008      |
| SGEVDPEIEESES MNRK                | 686   | 702 | yes                    | 73,9                    | 81,1                | 698                   | 2031,82  | 26,36    | 1,34E+008      |
| SGEVDPEIEESES MNRKELGEIGSK        | 686   | 710 | yes                    | 81,8                    | 99,8                | 698                   | 2829,24  | 41,59    | 1,89E+008      |
| SGEVDPEIEESES MNRKELGEIGSK        | 686   | 710 | yes                    | 82,4                    | 85,2                | 698                   | 2845,24  | 38,73    | 2,06E+008      |
| SGEVDPEIEESES MNRKELGEIGSK        | 686   | 710 | yes                    | 100,0                   | 100                 | 696&698               | 2925,20  | 38,63    | 4,40E+007      |
| RLMSPYETHVSTDLVGTL                | 883   | 900 | yes                    | 100,0                   | 74,7                | 893                   | 2098,99  | 53,63    | 5,06E+006      |
| RLMSPYETHVSTDLVGTL                | 883   | 900 | yes                    | 100,0                   | 99,4                | 886                   | 2114,98  | 49,76    | 8,96E+006      |
| LMSPYETHVSTDLVGTLGYIPPEYQQASVATYK | 884   | 916 | yes                    | 25,0                    | 49,4                | 886                   | 3683,72  | 58,87    | 3,29E+006      |

## Supplemental Table 4

**Supplemental Table 4.** Accession numbers of the AtPSKR1 orthologs identified from the Phytozome database and the respective protein accessions in NCBI. The asterisk indicates  $\geq 97\%$  identity to the Phytozome sequence.

| Organism                          | Accession Phytozome v10                  | Accession NCBI |
|-----------------------------------|------------------------------------------|----------------|
| <i>Physcomitrella patens</i>      | Phpat.001G165500.2                       | -              |
| <i>Selaginella moellendorffii</i> | 121260                                   | -              |
| <i>Amborella trichopoda</i>       | evm_27.model.AmTr_v1.0_scaffold00029.177 | XP_006847965*  |
| <i>Brachypodium distachyon</i>    | Bradi3g49370.1                           | XP_003575411   |
| <i>Oryza sativa</i>               | LOC_Os02g41890.1                         | -              |
| <i>Panicum virgatum</i>           | Pavir.Ga00206.1                          | -              |
| <i>Setaria italica</i>            | Si016177m                                | XP_004953174*  |
| <i>Sorghum bicolor</i>            | Sobic.004G222100.1                       | XP_002454207*  |
| <i>Zea mays</i>                   | GRMZM2G080537_T01                        | AFW72422       |
| <i>Aquilegia coerulea</i>         | Aquca_002_01421.1                        | -              |
| <i>Mimulus guttatus</i>           | Migut.E00603.1                           | EYU30259*      |
| <i>Solanum lycopersicum</i>       | Solyc01g008140.2.1                       | XP_004228537*  |
| <i>Solanum tuberosum</i>          | PGSC0003DMT400042178                     | XP_006348541*  |
| <i>Vitis vinifera</i>             | GSVIVT01014303001                        | CBI20272       |
| <i>Eucalyptus grandis</i>         | Eucgr.J01778.1                           | KCW52373       |
| <i>Populus trichocarpa</i>        | Potri.008G144700.1                       | XP_002312507*  |
| <i>Linum usitatissimum</i>        | Lus10005403                              | -              |
| <i>Manihot esculenta</i>          | cassava4.1_027914m                       | -              |
| <i>Ricinus communis</i>           | 29801.m003229                            | XP_002518809*  |
| <i>Carica papaya</i>              | evm.model.supercontig_2.62               | -              |
| <i>Gossypium raimondii</i>        | Gorai.005G151100.1                       | -              |
| <i>Theobroma cacao</i>            | Thecc1EG011306t1                         | XP_007045577   |
| <i>Arabidopsis lyrata</i>         | 484148                                   | XP_002876804   |
| <i>Arabidopsis thaliana</i>       | AT2G02220.1                              | Q9ZVR7         |
| <i>Boechera stricta</i>           | Bostr.0556s0048.1                        | -              |
| <i>Brassica rapa</i>              | Brara.F03427.1                           | -              |
| <i>Capsella grandiflora</i>       | Cagra.2767s0007.1                        | -              |
| <i>Capsella rubella</i>           | Carubv10019052m                          | XP_006292801   |
| <i>Eutrema salsugineum</i>        | Thhalv10003581m                          | XP_006395801   |
| <i>Citrus sinensis</i>            | orange1.1g035998m                        | XP_006470905*  |
| <i>Citrus clementina</i>          | Ciclev10004232m                          | XP_006420664   |
| <i>Cucumis sativus</i>            | Cucsa.229250.2                           | XP_004140449   |
| <i>Glycine max</i>                | Glyma.13G275100.1                        | -              |
| <i>Malus domestica</i>            | MDP0000142599                            | XP_008340497   |
| <i>Medicago truncatula</i>        | Medtr2g078810.1                          | KEH38700       |
| <i>Phaseolus vulgaris</i>         | Phvul.005G073800.1                       | XP_007149480*  |
| <i>Prunus persica</i>             | ppa000729m                               | XP_007227028   |

## Supplemental Table 5

**Supplemental Table 54.** Accession numbers of the AtPSKR2 orthologs identified from the Phytozome database and the respective protein accessions in NCBI. The asterisk indicates  $\geq 97\%$  identity to the Phytozome sequence.

| Organism                          | Accession Phytozome v10                | Accession NCBI |
|-----------------------------------|----------------------------------------|----------------|
| <i>Physcomitrella patens</i>      | Phpat.014G063600.1                     | -              |
| <i>Selaginella moellendorffii</i> | 121260                                 | -              |
| <i>Amborella trichopoda</i>       | evm_27.model.AmTr_v1.0_scaffold00160.2 | XP_006849388   |
| <i>Brachypodium distachyon</i>    | Bradi1g59360.1                         | XP_003561510*  |
| <i>Oryza sativa</i>               | LOC_Os04g57630.1                       | -              |
| <i>Panicum virgatum</i>           | Pavir.Bb00088.1                        | -              |
| <i>Setaria italica</i>            | Si031967m                              | XP_004955312*  |
| <i>Sorghum bicolor</i>            | Sobic.002G006100.1                     | XP_002459218*  |
| <i>Zea mays</i>                   | GRMZM2G120574_T01                      | XP_008651929*  |
| <i>Aquilegia coerulea</i>         | Aquca_036_00102.1                      | -              |
| <i>Mimulus guttatus</i>           | Migut.H01950.4                         | EYU26371*      |
| <i>Solanum lycopersicum</i>       | Solyc07g063000.2.1                     | XP_004244239*  |
| <i>Solanum tuberosum</i>          | PGSC0003DMT400032398                   | XP_006348262*  |
| <i>Vitis vinifera</i>             | GSVIVT01014303001                      | -              |
| <i>Eucalyptus grandis</i>         | Eucgr.F01155.2                         | KCW67382*      |
| <i>Populus trichocarpa</i>        | Potri.011G116900.1                     | XP_002317487   |
| <i>Linum usitatissimum</i>        | Lus10009213                            | -              |
| <i>Manihot esculenta</i>          | cassava4.1_000747m                     | -              |
| <i>Ricinus communis</i>           | 29668.m000312                          | XP_002528241*  |
| <i>Carica papaya</i>              | evm.model.supercontig_2.62             | -              |
| <i>Gossypium raimondii</i>        | Gorai.002G068500.2                     | -              |
| <i>Theobroma cacao</i>            | Thecc1EG031592t1                       | XP_007021540*  |
| <i>Arabidopsis lyrata</i>         | 495467                                 | XP_002864288   |
| <i>Arabidopsis thaliana</i>       | AT5G53890.1                            | Q9FN37         |
| <i>Boechera stricta</i>           | Bostr.26833s0888.1                     | -              |
| <i>Brassica rapa</i>              | Brara.J00880.1                         | XP_009119929*  |
| <i>Capsella grandiflora</i>       | Cagra.2460s0051.1                      | -              |
| <i>Capsella rubella</i>           | Carubv10025797m                        | XP_006279563   |
| <i>Eutrema salsugineum</i>        | Thhalv10012554m                        | XP_006401649   |
| <i>Citrus sinensis</i>            | orange1.1g001591m                      | XP_006464783*  |
| <i>Citrus clementina</i>          | Ciclev10007314m                        | XP_006451809   |
| <i>Cucumis sativus</i>            | Cucsa.032510.1                         | XP_004146245*  |
| <i>Glycine max</i>                | Glyma.13G275100.1                      | XP_006594757*  |
| <i>Malus domestica</i>            | MDP0000950533                          | XP_008349995*  |
| <i>Medicago truncatula</i>        | Medtr2g078810.1                        | -              |
| <i>Phaseolus vulgaris</i>         | Phvul.005G073800.1                     | -              |
| <i>Prunus persica</i>             | ppa000652m                             | XP_007213710   |
